# Supplementary material
Source: PubMed Central journal article supplement (PMC4467782)
Supplement: NIHMS698294-supplement-Sup.pdf [file NIHMS698294-supplement-Sup.pdf]

**Recurrent *TERT* promoter mutations identified in a large-scale study of multiple tumor types are associated with increased *TERT* expression and telomerase activation**

**Supplementary Tables**

**Table S1. *TERT* promoter mutations in tumor samples in a Chinese population.** Listed below are all mutations identified in 799 tumor samples from Sanger sequencing. The surrounding sequence was used to determine whether or not an ETS binding site was formed (underlined) in the presence of the mutation (red, bold text). ETS binding sites were taken as either: A/TTCCGG (6bp) or A/TTCC (4 bp) (reverse complement: CCGGAA/T (6 bp) or GGAA/T (4 bp)).

| <b>Mutation Name</b>        | <b>Location (hg19, antisense)</b>         | <b>Base change</b>      | <b>Distance from <i>TERT</i> ATG (bp)</b> | <b>Genomic sequence +/- 10 bp (hg19 assembly, antisense)</b> | <b>Genomic sequence +/- 10 bp with mutation (hg19 assembly, antisense)</b> | <b>Generates ETS binding site?</b> |
|-----------------------------|-------------------------------------------|-------------------------|-------------------------------------------|--------------------------------------------------------------|----------------------------------------------------------------------------|------------------------------------|
| C250T                       | chr5:1,295,250                            | C > T                   | -146                                      | CCCGACCCCT <b>C</b> CCGG<br>GTCCCC                           | CCCGACCCCT <b>T</b> CCGGGT<br>CCCC                                         | Yes, 6 bp                          |
| G245A                       | chr5:1,295,245                            | G > A                   | -141                                      | CCCCTCCCGG <b>G</b> TCCC<br>CGGCC                            | CCCCTCCCGG <b>A</b> TCCCCG<br>GCC                                          | Yes, 4 bp                          |
| C242T +<br>C243T            | chr5:1,295,242-<br>1,295,243              | C > T,<br>C > T         | - 138, - 139                              | CCTCCCGGGT <b>C</b> CCCG<br>GCCAGC                           | CCTCCCGGGT <b>TT</b> CCGGC<br>CCAGC                                        | Yes, 6 bp                          |
| C242T +<br>C243T +<br>C250T | chr5:1,295,242-<br>1,295,243<br>1,295,250 | C > T,<br>C > T,<br>C>T | - 138, - 139,<br>- 146                    | CCCGACCCCT <b>C</b> CCGG<br>GT <b>C</b> CCCGGCCAGC           | CCCGACCCCT <b>T</b> CCGGGT<br><b>TT</b> CCGGGCCAGC                         | Yes, two 6 bp                      |
| C228T                       | chr5:1,295,228                            | C > T                   | - 124                                     | GCCAGCCCC <b>C</b> TCCG<br>GGCCCT                            | GCCAGCCCC <b>T</b> TCCGGG<br>CCCT                                          | Yes, 6 bp                          |
| C228A                       | chr5:1,295,228                            | C > A                   | - 104                                     | GCCAGCCCC <b>C</b> TCCG<br>GGCCCT                            | GCCAGCCCC <b>A</b> TCCGGG<br>CCCT                                          | Yes, 6 bp                          |
| T198G                       | chr5:1,295,198                            | T > G                   | - 94                                      | TCCCCTTCCT <b>T</b> TCCGC<br>GGCCC                           | TCCCCTTCCT <b>G</b> TCCGCG<br>GCC                                          | No                                 |

|                  |                              |                 |            |                                                  |                                                              |           |
|------------------|------------------------------|-----------------|------------|--------------------------------------------------|--------------------------------------------------------------|-----------|
| C193T            | chr5:1,295,193               | C > T           | - 89       | TTCCTTTCCG <b>C</b> GGCC<br>CCGCCC               | TTCCTTTCCG <b>T</b> GGCCCC<br>GCCC                           | No        |
| C184T +<br>C190T | chr5:1,295,184,<br>1,295,190 | C > T,<br>C > T | - 80, - 86 | CTTTCCGCGG <b>C</b> CCCG<br><b>C</b> CCTCTCCTCGC | CTTTCCGCGG <b>T</b> CCCG <b>C</b> <b>T</b><br>CTCT<br>CCTCGC | No        |
| A161C            | chr5:1,295,161               | A > C           | - 57       | CGCGAGTTT <b>C</b> AGGCA<br>GCGCTG               | CGCGAGTTT <b>C</b> CGGCAGC<br>GCTG                           | Yes, 6 bp |
| C158A            | chr5:1,295,158               | C > A           | - 54       | GAGTTTCAGG <b>C</b> AGCG<br>CTGCGT               | GAGTTTCAGG <b>A</b> AGCGCT<br>GCGT                           | Yes, 4 bp |
| G149T            | chr5:1,295,149               | G > T           | - 45       | GCAGCGCTGC <b>G</b> TCCT<br>GCTGCG               | GCAGCGCTGC <b>T</b> TCCTGC<br>TGCG                           | Yes, 4 bp |

**Table S2.** *TERT* promoter mutations in Chinese patient tumors, organized by tumor type. Urinary tract cancers displayed the largest number of different *TERT* promoter mutations, while most other tumors had only C228T or C250T hotspot somatic mutations (except for CNS tumors which had 1 case of C242T+C243T).

| Tumor type                       | Mutation name         | Genomic position                      | Distance from ATG translation start site (bp) | Base change | No. of mutation tumors (%) |
|----------------------------------|-----------------------|---------------------------------------|-----------------------------------------------|-------------|----------------------------|
| Urinary tract cancers<br>(n=292) | C250T                 | 1,295,250                             | -146                                          | C>T         | 42(14.4)                   |
|                                  | C228T                 | 1,295,228                             | -124                                          | C>T         | 116(39.7)                  |
|                                  | C228A                 | 1,295,228                             | -124                                          | C>A         | 2(0.7)                     |
|                                  | G245A                 | 1,295,245                             | -141                                          | G>A         | 1(0.3)                     |
|                                  | C242T+C243T           | 1,295,242 and<br>1,295,243            | -138 and -139                                 | C>T         | 6(2.1)                     |
|                                  | C250T<br>+C242T+C243T | 1,295,250, 1,295,242<br>and 1,295,243 | -146, -138 and -139                           | C>T         | 1(0.3)                     |
|                                  | T198G                 | 1,295,198                             | -93                                           | T>G         | 1(0.3)                     |
|                                  | C193T                 | 1,295,193                             | -89                                           | C>T         | 1(0.3)                     |
|                                  | C190T+C184T           | 1,295,190 and<br>1,295,184            | -86 and -80                                   | C>T         | 1(0.3)                     |
|                                  | A161C                 | 1,295,161                             | -57                                           | A>C         | 12(4.1)                    |
|                                  | C158A                 | 1,295,158                             | -54                                           | C>A         | 3(1.0)                     |
| G149T                            | 1,295,149             | -45                                   | G>T                                           | 2(0.7)      |                            |
| Diffuse astrocytomas             | C228T                 | 1,295,228                             | -124                                          | C>T         | 5(12.5)                    |

|                                           |             |                            |               |     |          |
|-------------------------------------------|-------------|----------------------------|---------------|-----|----------|
| (n=40)                                    | C250T       | 1,295,250                  | -146          | C>T | 2(5.0)   |
|                                           | C242T+C243T | 1,295,242 and<br>1,295,243 | -138 and -139 | C>T | 1(2.5)   |
| <b>Anaplastic astrocytomas</b><br>(n=12)  | C228T       | 1,295,228                  | -124          | C>T | 4(33.3)  |
|                                           | C250T       | 1,295,250                  | -146          | C>T | 0(0.0)   |
| <b>Glioblastoma</b><br>(n=56)             | C228T       | 1,295,228                  | -124          | C>T | 31(55.4) |
|                                           | C250T       | 1,295,250                  | -146          | C>T | 16(28.6) |
| <b>Oligodendroglioma</b><br>(n=10)        | C228T       | 1,295,228                  | -124          | C>T | 6(60.0)  |
|                                           | C250T       | 1,295,250                  | -146          | C>T | 1(10.0)  |
| <b>Medulloblastoma</b><br>(n=6)           | C228T       | 1,295,228                  | -124          | C>T | 1(16.7)  |
|                                           | C250T       | 1,295,250                  | -146          | C>T | 1(16.7)  |
| <b>Hepatocellular carcinoma</b><br>(n=35) | C228T       | 1,295,228                  | -124          | C>T | 9(25.7)  |
|                                           | C250T       | 1,295,250                  | -146          | C>T | 2(5.7)   |
| <b>Gallbladder carcinoma</b><br>(n=2)     | C228T       | 1,295,228                  | -124          | C>T | 1(50.0)  |

## Supplementary Figures

**Figure S1.** *TERT* promoter mutations identified in tumor samples.

Reference sequence is located on top of each panel. Panels (A) and (B) contain mutations that generate ETS binding sites (A/TTCCGG or A/TCC, reverse complement: CCGGAA/T or GGAA/T). G149T, C158A, A161C, C228T, C228A, C242T+C243T, C242T+C243T+C250T, and C250T all generate de novo ETS binding sites.

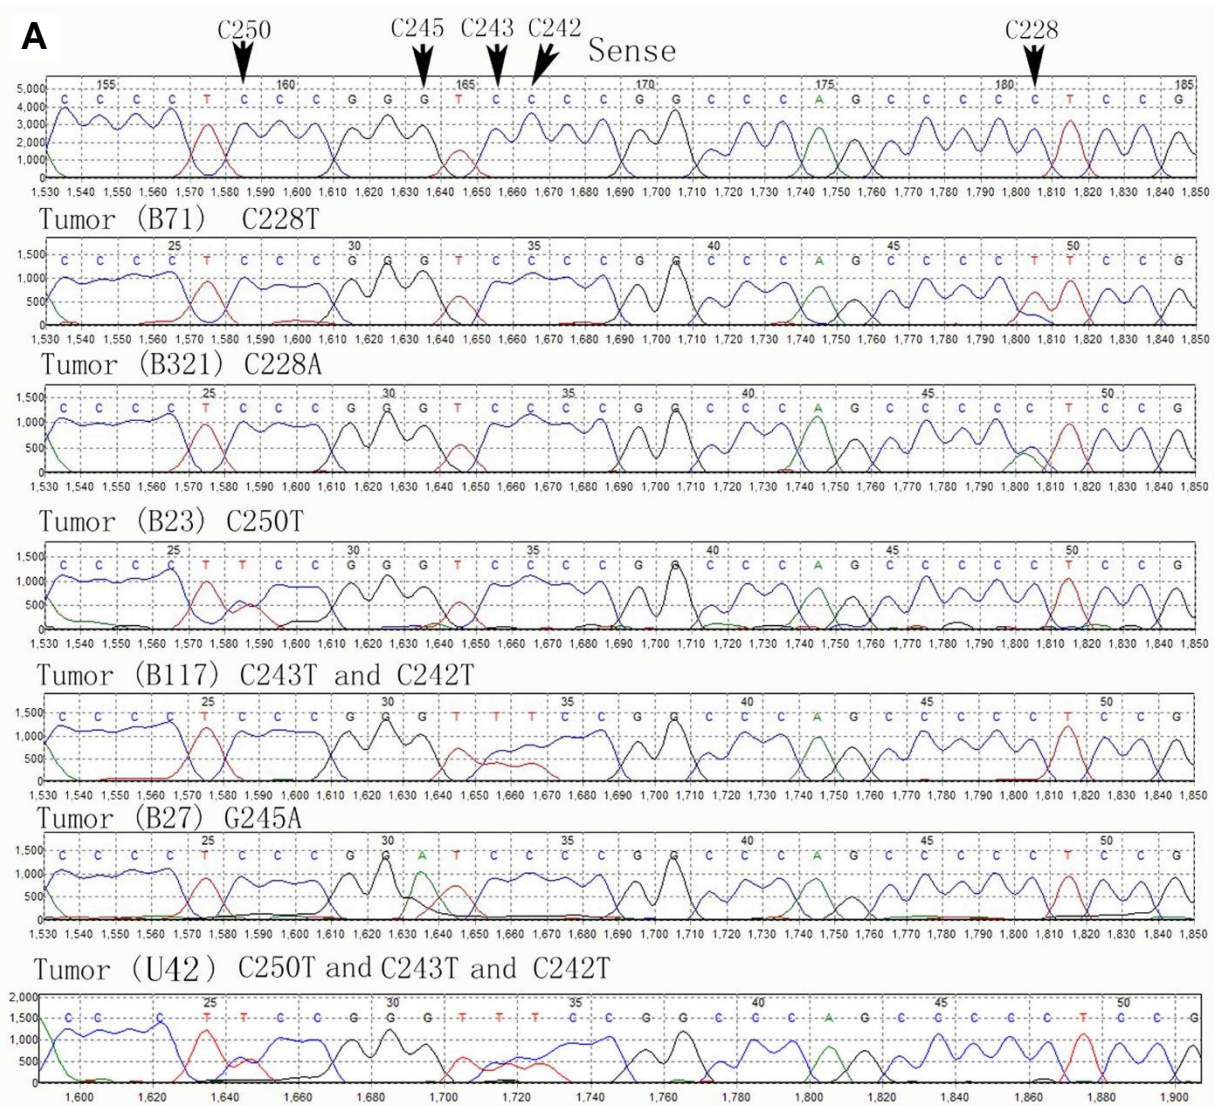

**B**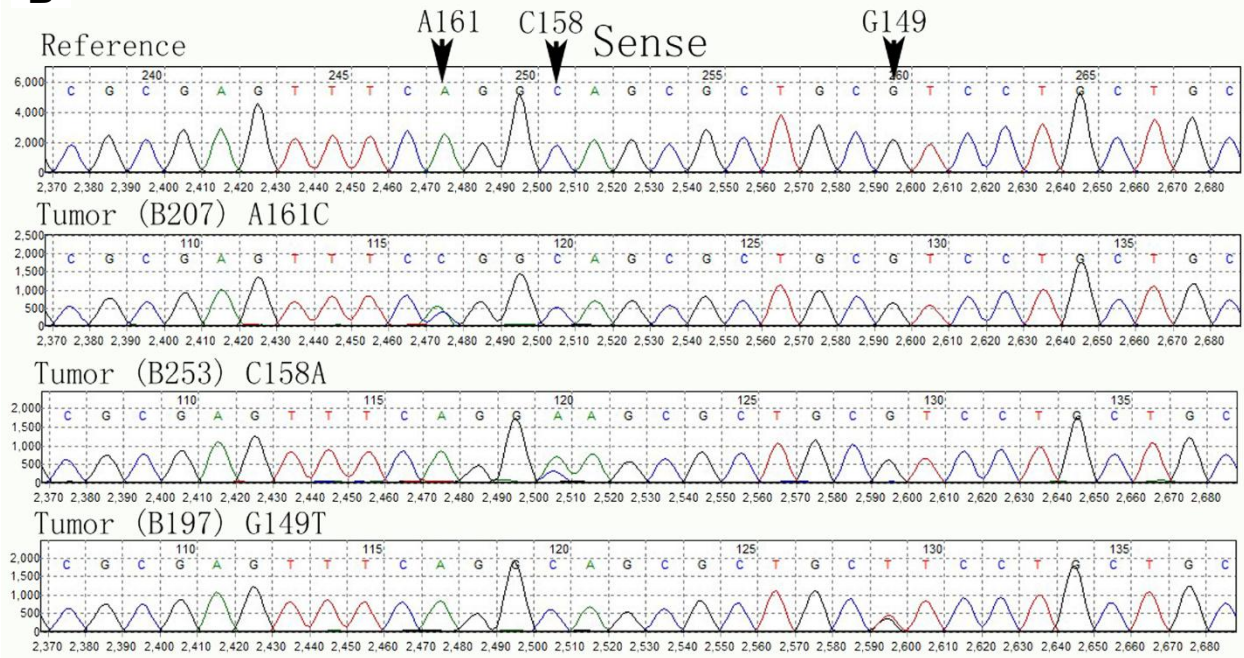

**C**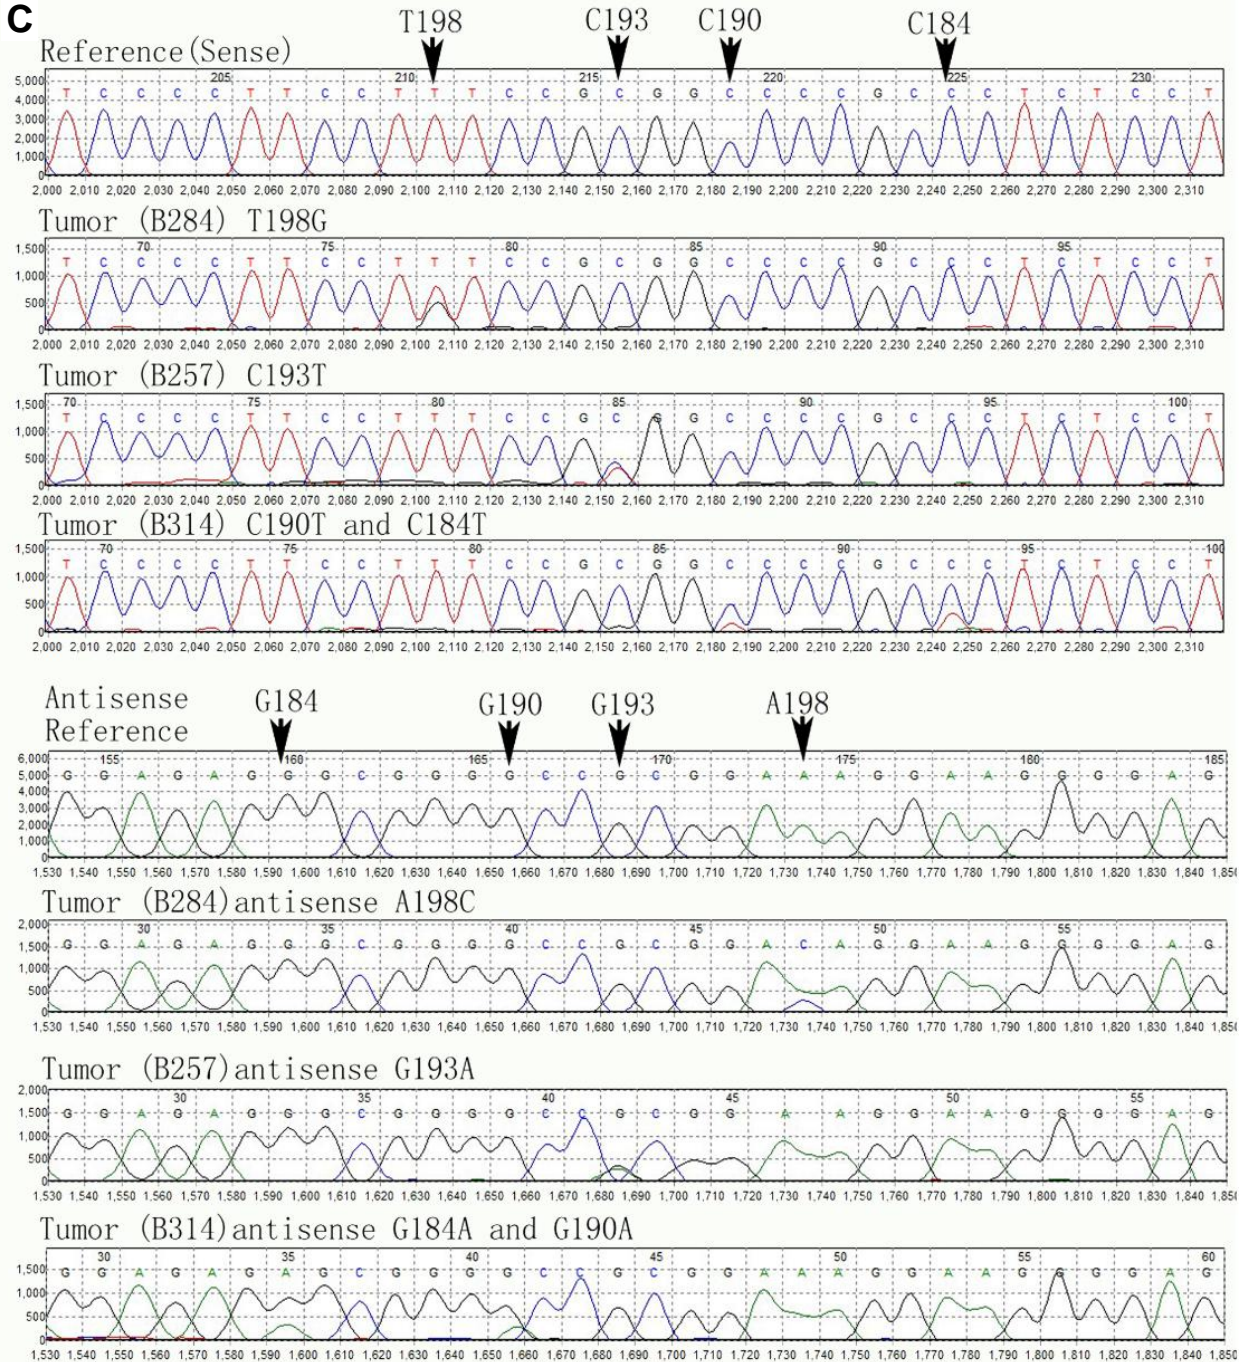

**Table S3.** Mean Age at Diagnosis Analysis: For patient cohorts with *TERT* promoter mutations and cohort sizes of greater than 50 by tumor type, mean age at diagnosis was analyzed. Unpaired t-test assuming unequal variances was used to compare the mean age at diagnosis of these patient groups with and without *TERT* promoter mutations.

|                                           | All cases ( <i>TERT</i> promoter mutant and WT) |     | <i>TERT</i> promoter mutant cases |     |                                | <i>TERT</i> promoter WT cases |     |                                | t-test ( <i>TERT</i> promoter mutant vs. WT age) |
|-------------------------------------------|-------------------------------------------------|-----|-----------------------------------|-----|--------------------------------|-------------------------------|-----|--------------------------------|--------------------------------------------------|
|                                           | Age (years)                                     | N   | Age (years)                       | N   | % of total cases of this group | Age (years)                   | N   | % of total cases of this group | p value *                                        |
| <b>Glioma (Grade II-IV)</b>               | 50.69                                           | 121 | 54.95                             | 66  | 54.55%                         | 45.56                         | 55  | 45.45%                         | <b>0.0003</b>                                    |
| <b>Glioma (Grade IV, GBM)</b>             | 57.5                                            | 56  | 57.23                             | 47  | 83.93%                         | 58.9                          | 9   | 16.07%                         | 0.7680                                           |
| <b>Glioma (Grade II-III)</b>              | 44.82                                           | 65  | 49.32                             | 19  | 29.23%                         | 42.96                         | 46  | 70.77%                         | 0.0290                                           |
| <b>Urinary Tract Cancer, All</b>          | 67.37                                           | 292 | 67.97                             | 188 | 64.38%                         | 66.29                         | 104 | 35.62%                         | 1.0428                                           |
| <b>Urinary Tract Cancer, Infiltrating</b> | 68.99                                           | 131 | 69.08                             | 91  | 69.47%                         | 68.8                          | 40  | 30.53%                         | 0.1301                                           |
| <b>Urinary Tract Cancer, Non-invasive</b> | 66.05                                           | 161 | 66.93                             | 97  | 60.25%                         | 64.72                         | 64  | 39.75%                         | 0.9707                                           |



**Table S4.** Patients evaluated for *TERT* Promoter mutations: Total 799 tumor samples tested, divided by system (CNS, urinary tract, hepatobiliary, gastric, pancreatic, thymic) and glioma samples used for TRAP assay and RT-qPCR

**A. CNS tumors: n= 204**

**Patients evaluated for *TERT* promoter mutations**

| Sample ID# | Tissue type | Gender | Age (years) | Tumor Type             | Grade | <i>TERT</i> promoter mutation status |
|------------|-------------|--------|-------------|------------------------|-------|--------------------------------------|
| 43         | FFPE        | Male   | 54          | Angiomatous meningioma | I     | None                                 |
| 52         | FFPE        | Female | 56          | Angiomatous meningioma | I     | None                                 |
| 51         | FFPE        | Female | 60          | Fibrous meningioma     | I     | None                                 |
| 1          | FFPE        | Female | 63          | Meningioma             | I     | None                                 |
| 2          | FFPE        | Female | 72          | Meningioma             | I     | None                                 |
| 3          | FFPE        | Female | 55          | Meningioma             | I     | None                                 |
| 4          | FFPE        | Female | 60          | Meningioma             | I     | None                                 |
| 5          | FFPE        | Male   | 59          | Meningioma             | I     | None                                 |
| 6          | FFPE        | Female | 48          | Meningioma             | I     | None                                 |
| 7          | FFPE        | Male   | 52          | Meningioma             | I     | None                                 |
| 8          | FFPE        | Female | 73          | Meningioma             | I     | None                                 |
| 10         | FFPE        | Female | 39          | Meningioma             | I     | None                                 |
| 11         | FFPE        | Female | 53          | Meningioma             | I     | None                                 |
| 12         | FFPE        | Male   | 72          | Meningioma             | I     | None                                 |
| 13         | FFPE        | Female | 39          | Meningioma             | I     | None                                 |
| 14         | FFPE        | Female | 62          | Meningioma             | I     | None                                 |
| 15         | FFPE        | Female | 53          | Meningioma             | I     | None                                 |
| 17         | FFPE        | Female | 54          | Meningioma             | I     | None                                 |
| 20         | FFPE        | Female | 50          | Meningioma             | I     | None                                 |
| 21         | FFPE        | Female | 57          | Meningioma             | I     | None                                 |
| 22         | FFPE        | Female | 46          | Meningioma             | I     | None                                 |
| 23         | FFPE        | Female | 41          | Meningioma             | I     | None                                 |
| 24         | FFPE        | Female | 55          | Meningioma             | I     | None                                 |
| 25         | FFPE        | Female | 58          | Meningioma             | I     | None                                 |
| 28         | FFPE        | Female | 61          | Meningioma             | I     | None                                 |
| 31         | FFPE        | Female | 61          | Meningioma             | I     | None                                 |
| 32         | FFPE        | Female | 43          | Meningioma             | I     | None                                 |
| 33         | FFPE        | Male   | 75          | Meningioma             | I     | None                                 |

|     |      |        |    |            |   |      |
|-----|------|--------|----|------------|---|------|
| 34  | FFPE | Female | 52 | Meningioma | I | None |
| 35  | FFPE | Female | 62 | Meningioma | I | None |
| 36  | FFPE | Male   | 57 | Meningioma | I | None |
| 37  | FFPE | Female | 61 | Meningioma | I | None |
| 38  | FFPE | Male   | 71 | Meningioma | I | None |
| 39  | FFPE | Female | 61 | Meningioma | I | None |
| 40  | FFPE | Female | 58 | Meningioma | I | None |
| 41  | FFPE | Male   | 36 | Meningioma | I | None |
| 44  | FFPE | Female | 39 | Meningioma | I | None |
| 45  | FFPE | Male   | 55 | Meningioma | I | None |
| 46  | FFPE | Female | 61 | Meningioma | I | None |
| 47  | FFPE | Female | 64 | Meningioma | I | None |
| 48  | FFPE | Female | 46 | Meningioma | I | None |
| 53  | FFPE | Female | 54 | Meningioma | I | None |
| 54  | FFPE | Female | 46 | Meningioma | I | None |
| 56  | FFPE | Female | 45 | Meningioma | I | None |
| 58  | FFPE | Female | 47 | Meningioma | I | None |
| 59  | FFPE | Male   | 35 | Meningioma | I | None |
| 61  | FFPE | Male   | 71 | Meningioma | I | None |
| 62  | FFPE | Female | 20 | Meningioma | I | None |
| 63  | FFPE | Male   | 45 | Meningioma | I | None |
| 67  | FFPE | Female | 40 | Meningioma | I | None |
| 68  | FFPE | Female | 61 | Meningioma | I | None |
| 72  | FFPE | Male   | 48 | Meningioma | I | None |
| 75  | FFPE | Female | 64 | Meningioma | I | None |
| 76  | FFPE | Male   | 62 | Meningioma | I | None |
| 77  | FFPE | Female | 61 | Meningioma | I | None |
| 78  | FFPE | Male   | 65 | Meningioma | I | None |
| 80  | FFPE | Female | 69 | Meningioma | I | None |
| 81  | FFPE | Male   | 72 | Meningioma | I | None |
| 82  | FFPE | Male   | 33 | Meningioma | I | None |
| 88  | FFPE | Female | 39 | Meningioma | I | None |
| 90  | FFPE | Female | 34 | Meningioma | I | None |
| 95  | FFPE | Male   | 52 | Meningioma | I | None |
| 96  | FFPE | Female | 75 | Meningioma | I | None |
| 98  | FFPE | Female | 58 | Meningioma | I | None |
| 99  | FFPE | Male   | 64 | Meningioma | I | None |
| 102 | FFPE | Male   | 61 | Meningioma | I | None |
| 104 | FFPE | Female | 45 | Meningioma | I | None |
| 109 | FFPE | Male   | 55 | Meningioma | I | None |

|     |      |        |    |                                     |    |       |
|-----|------|--------|----|-------------------------------------|----|-------|
| 110 | FFPE | Female | 50 | Meningioma                          | I  | None  |
| 111 | FFPE | Female | 51 | Meningioma                          | I  | None  |
| 114 | FFPE | Female | 34 | Meningioma                          | I  | None  |
| 116 | FFPE | Female | 56 | Meningioma                          | I  | None  |
| 26  | FFPE | Female | 63 | Meningothelial meningioma           | I  | None  |
| 115 | FFPE | Male   | 45 | Meningothelial meningioma           | I  | None  |
| 165 | FFPE | Male   | 3  | Pilocytic Astrocytoma               | I  | None  |
| 214 | FFPE | Female | 12 | Subependymal Giant Cell Astrocytoma | I  | None  |
| 27  | FFPE | Female | 58 | Atypical meningioma                 | II | None  |
| 29  | FFPE | Female | 40 | Atypical meningioma                 | II | None  |
| 148 | FFPE | Female | 11 | Diffuse Astrocytoma                 | II | None  |
| 118 | FFPE | Male   | 40 | Diffuse Astrocytoma                 | II | None  |
| 119 | FFPE | Male   | 51 | Diffuse Astrocytoma                 | II | None  |
| 123 | FFPE | Female | 56 | Diffuse Astrocytoma                 | II | None  |
| 127 | FFPE | Male   | 61 | Diffuse Astrocytoma                 | II | None  |
| 130 | FFPE | Male   | 48 | Diffuse Astrocytoma                 | II | None  |
| 136 | FFPE | Female | 44 | Diffuse Astrocytoma                 | II | None  |
| 142 | FFPE | Male   | 47 | Diffuse Astrocytoma                 | II | None  |
| 145 | FFPE | Male   | 39 | Diffuse Astrocytoma                 | II | None  |
| 156 | FFPE | Male   | 33 | Diffuse Astrocytoma                 | II | None  |
| 157 | FFPE | Female | 47 | Diffuse Astrocytoma                 | II | C228T |
| 159 | FFPE | Female | 32 | Diffuse Astrocytoma                 | II | None  |
| 160 | FFPE | Male   | 49 | Diffuse Astrocytoma                 | II | None  |
| 161 | FFPE | Male   | 38 | Diffuse Astrocytoma                 | II | None  |
| 173 | FFPE | Female | 29 | Diffuse Astrocytoma                 | II | None  |
| 177 | FFPE | Male   | 40 | Diffuse Astrocytoma                 | II | None  |
| 178 | FFPE | Male   | 15 | Diffuse Astrocytoma                 | II | None  |
| 179 | FFPE | Male   | 33 | Diffuse Astrocytoma                 | II | None  |
| 207 | FFPE | Female | 34 | Diffuse Astrocytoma                 | II | None  |
| 208 | FFPE | Female | 49 | Diffuse Astrocytoma                 | II | None  |
| 211 | FFPE | Male   | 38 | Diffuse Astrocytoma                 | II | C228T |
| 217 | FFPE | Female | 45 | Diffuse Astrocytoma                 | II | None  |
| 219 | FFPE | Male   | 41 | Diffuse Astrocytoma                 | II | None  |
| 225 | FFPE | Male   | 27 | Diffuse Astrocytoma                 | II | None  |
| 230 | FFPE | Female | 25 | Diffuse Astrocytoma                 | II | None  |
| 232 | FFPE | Male   | 45 | Diffuse Astrocytoma                 | II | None  |
| 126 | FFPE | Female | 39 | Diffuse Astrocytoma                 | II | None  |
| 151 | FFPE | Female | 61 | Diffuse Astrocytoma                 | II | None  |
| 154 | FFPE | Male   | 39 | Diffuse Astrocytoma                 | II | C250T |

|     |      |        |    |                                                   |     |             |
|-----|------|--------|----|---------------------------------------------------|-----|-------------|
| 174 | FFPE | Male   | 78 | Diffuse Astrocytoma                               | II  | None        |
| 175 | FFPE | Female | 45 | Diffuse Astrocytoma                               | II  | None        |
| 176 | FFPE | Male   | 41 | Diffuse Astrocytoma                               | II  | C228T       |
| 182 | FFPE | Female | 35 | Diffuse Astrocytoma                               | II  | C228T       |
| 199 | FFPE | Female | 55 | Diffuse Astrocytoma                               | II  | None        |
| 200 | FFPE | Male   | 51 | Diffuse Astrocytoma                               | II  | None        |
| 222 | FFPE | Male   | 66 | Diffuse Astrocytoma                               | II  | C250T       |
| 150 | FFPE | Male   | 58 | Diffuse Astrocytoma<br>(Gemistocytic Astrocytoma) | II  | C228T       |
| 120 | FFPE | Female | 45 | Diffuse Astrocytoma<br>(Gemistocytic Astrocytoma) | II  | None        |
| 183 | FFPE | Female | 48 | Diffuse Astrocytoma<br>(Gemistocytic Astrocytoma) | II  | None        |
| 147 | FFPE | Female | 40 | Diffuse Astrocytoma<br>(Protoplasmic Astrocytoma) | II  | C242T+C243T |
| 155 | FFPE | Male   | 49 | Oligodendroglioma                                 | II  | C250T       |
| 162 | FFPE | Male   | 56 | Oligodendroglioma                                 | II  | C228T       |
| 121 | FFPE | Male   | 44 | Oligodendroglioma                                 | II  | None        |
| 166 | FFPE | Male   | 57 | Oligodendroglioma                                 | II  | C228T       |
| 195 | FFPE | Male   | 53 | Oligodendroglioma                                 | II  | None        |
| 122 | FFPE | Male   | 44 | Oligodendroglioma                                 | II  | C228T       |
| 190 | FFPE | Male   | 45 | Oligodendroglioma                                 | II  | C228T       |
| 149 | FFPE | Male   | 28 | Pleomorphic<br>Xanthoastrocytoma                  | II  | None        |
| 143 | FFPE | Male   | 63 | Anaplastic Astrocytoma                            | III | C228T       |
| 209 | FFPE | Female | 14 | Anaplastic Astrocytoma                            | III | None        |
| 202 | FFPE | Male   | 52 | Anaplastic Astrocytoma                            | III | C228T       |
| 171 | FFPE | Female | 48 | Anaplastic Astrocytoma                            | III | C228T       |
| 180 | FFPE | Female | 67 | Anaplastic Astrocytoma                            | III | None        |
| 189 | FFPE | Male   | 44 | Anaplastic Astrocytoma                            | III | C228T       |
| 197 | FFPE | Male   | 24 | Anaplastic Astrocytoma                            | III | None        |
| 203 | FFPE | Female | 54 | Anaplastic Astrocytoma                            | III | None        |
| 223 | FFPE | Female | 43 | Anaplastic Astrocytoma                            | III | None        |
| 226 | FFPE | Male   | 67 | Anaplastic Astrocytoma                            | III | None        |
| 198 | FFPE | Male   | 45 | Anaplastic Astrocytoma                            | III | None        |
| 206 | FFPE | Male   | 36 | Anaplastic Astrocytoma                            | III | None        |
| 91  | FFPE | Male   | 66 | Invasive meningioma (<br>malignant meningioma)    | III | None        |
| 60  | FFPE | Male   | 49 | Oligodendroglioma                                 | III | None        |
| 69  | FFPE | Male   | 57 | Oligodendroglioma                                 | III | C228T       |
| 107 | FFPE | Female | 58 | Oligodendroglioma                                 | III | C228T       |

|     |      |        |    |                         |    |       |
|-----|------|--------|----|-------------------------|----|-------|
| 108 | FFPE | Female | 55 | Giant cell Glioblastoma | IV | C228T |
| 221 | FFPE | Female | 66 | Glioblastoma multiforme | IV | C228T |
| 218 | FFPE | Male   | 72 | Glioblastoma multiforme | IV | C228T |
| 124 | FFPE | Male   | 55 | Glioblastoma multiforme | IV | C228T |
| 137 | FFPE | Male   | 40 | Glioblastoma multiforme | IV | C228T |
| 146 | FFPE | Female | 56 | Glioblastoma multiforme | IV | None  |
| 134 | FFPE | Male   | 50 | Glioblastoma multiforme | IV | C228T |
| 139 | FFPE | Female | 51 | Glioblastoma multiforme | IV | C228T |
| 141 | FFPE | Male   | 41 | Glioblastoma multiforme | IV | C250T |
| 164 | FFPE | Female | 40 | Glioblastoma multiforme | IV | C228T |
| 185 | FFPE | Female | 61 | Glioblastoma multiforme | IV | C250T |
| 187 | FFPE | Male   | 44 | Glioblastoma multiforme | IV | C228T |
| 188 | FFPE | Female | 58 | Glioblastoma multiforme | IV | C228T |
| 193 | FFPE | Female | 65 | Glioblastoma multiforme | IV | C250T |
| 194 | FFPE | Female | 70 | Glioblastoma multiforme | IV | C228T |
| 213 | FFPE | Female | 68 | Glioblastoma multiforme | IV | C228T |
| 210 | FFPE | Male   | 60 | Glioblastoma multiforme | IV | C228T |
| 229 | FFPE | Female | 56 | Glioblastoma multiforme | IV | None  |
| 9   | FFPE | Male   | 60 | Glioblastoma multiforme | IV | C228T |
| 19  | FFPE | Male   | 60 | Glioblastoma multiforme | IV | C228T |
| 49  | FFPE | Female | 52 | Glioblastoma multiforme | IV | C228T |
| 50  | FFPE | Female | 64 | Glioblastoma multiforme | IV | C228T |
| 57  | FFPE | Male   | 42 | Glioblastoma multiforme | IV | C250T |
| 64  | FFPE | Male   | 51 | Glioblastoma multiforme | IV | C250T |
| 71  | FFPE | Male   | 69 | Glioblastoma multiforme | IV | C228T |
| 73  | FFPE | Female | 62 | Glioblastoma multiforme | IV | C228T |
| 74  | FFPE | Female | 33 | Glioblastoma multiforme | IV | None  |
| 83  | FFPE | Female | 40 | Glioblastoma multiforme | IV | C228T |
| 84  | FFPE | Male   | 62 | Glioblastoma multiforme | IV | None  |
| 85  | FFPE | Female | 78 | Glioblastoma multiforme | IV | None  |
| 86  | FFPE | Male   | 66 | Glioblastoma multiforme | IV | C228T |
| 89  | FFPE | Male   | 38 | Glioblastoma multiforme | IV | C250T |
| 92  | FFPE | Female | 62 | Glioblastoma multiforme | IV | C250T |
| 93  | FFPE | Female | 67 | Glioblastoma multiforme | IV | None  |
| 100 | FFPE | Female | 60 | Glioblastoma multiforme | IV | C228T |
| 106 | FFPE | Male   | 65 | Glioblastoma multiforme | IV | C250T |
| 112 | FFPE | Male   | 38 | Glioblastoma multiforme | IV | None  |
| 113 | FFPE | Male   | 55 | Glioblastoma multiforme | IV | C228T |
| 117 | FFPE | Male   | 66 | Glioblastoma multiforme | IV | C228T |
| 131 | FFPE | Male   | 42 | Glioblastoma multiforme | IV | C228T |

|     |      |        |           |                         |    |       |
|-----|------|--------|-----------|-------------------------|----|-------|
| 170 | FFPE | Male   | 44        | Glioblastoma multiforme | IV | C228T |
| 227 | FFPE | Male   | 60        | Glioblastoma multiforme | IV | C250T |
| 228 | FFPE | Female | 50        | Glioblastoma multiforme | IV | C250T |
| 231 | FFPE | Female | 62        | Glioblastoma multiforme | IV | None  |
| 55  | FFPE | Female | 68        | Glioblastoma multiforme | IV | C228T |
| 79  | FFPE | Male   | 72        | Glioblastoma multiforme | IV | C228T |
| 94  | FFPE | Female | 87        | Glioblastoma multiforme | IV | C250T |
| 101 | FFPE | Male   | 45        | Glioblastoma multiforme | IV | C250T |
| 129 | FFPE | Female | 51        | Glioblastoma multiforme | IV | C228T |
| 138 | FFPE | Male   | 54        | Glioblastoma multiforme | IV | C250T |
| 163 | FFPE | Female | 87        | Glioblastoma multiforme | IV | C250T |
| 167 | FFPE | Male   | 54        | Glioblastoma multiforme | IV | C250T |
| 196 | FFPE | Male   | 57        | Glioblastoma multiforme | IV | C228T |
| 204 | FFPE | Female | 66        | Glioblastoma multiforme | IV | C228T |
| 205 | FFPE | Female | 78        | Glioblastoma multiforme | IV | None  |
| 215 | FFPE | Male   | 45        | Glioblastoma multiforme | IV | C250T |
| 168 | FFPE | Male   | 50        | Medulloblastoma         | IV | None  |
| 172 | FFPE | Male   | 20        | Medulloblastoma         | IV | None  |
| 192 | FFPE | Female | 11 months | Medulloblastoma         | IV | C228T |
| 212 | FFPE | Male   | 9         | Medulloblastoma         | IV | None  |
| 224 | FFPE | Female | 4         | Medulloblastoma         | IV | C250T |
| 133 | FFPE | Male   | 15        | Medulloblastoma         | IV | None  |

**B. Urinary Tract Cancers: n=292**

**Patients evaluated for *TERT* promoter mutations**

| <b>Sample ID#</b> | <b>Tissue type</b> | <b>Gender</b> | <b>Age (years)</b> | <b>Tumor Type</b>                                                          | <b>Invasive?</b> | <b><i>TERT</i> promoter mutation status</b> |
|-------------------|--------------------|---------------|--------------------|----------------------------------------------------------------------------|------------------|---------------------------------------------|
| B7                | FFPE               | Male          | 60                 | Urothelial carcinoma of the upper urinary tract                            | infiltrating     | C228T                                       |
| B12               | FFPE               | Male          | 73                 | Urothelial carcinoma of the upper urinary tract                            | infiltrating     | C250T                                       |
| B14               | FFPE               | Male          | 55                 | Urothelial carcinoma of the upper urinary tract                            | infiltrating     | C228T                                       |
| B26               | FFPE               | Male          | 79                 | Urothelial carcinoma of the upper urinary tract                            | non-invasive     | C228T                                       |
| B32               | FFPE               | Male          | 65                 | Urothelial carcinoma of the upper urinary tract                            | non-invasive     | C228T                                       |
| B72               | FFPE               | Male          | 82                 | Urothelial carcinoma of the upper urinary tract                            | non-invasive     | C228T                                       |
| B104              | FFPE               | Male          | 73                 | Urothelial carcinoma of the upper urinary tract(squamous differentiation)  | infiltrating     | C228T                                       |
| B114              | FFPE               | Male          | 45                 | Urothelial carcinoma of the upper urinary tract                            | infiltrating     | C242T+C243T                                 |
| B127              | FFPE               | Female        | 76                 | Urothelial carcinoma of the upper urinary tract (squamous differentiation) | infiltrating     | C228T                                       |
| B131              | FFPE               | Male          | 81                 | Urothelial carcinoma of the upper urinary tract                            | non-invasive     | C250T                                       |
| B133              | FFPE               | Male          | 61                 | Urothelial carcinoma of the upper urinary tract                            | non-invasive     | None                                        |
| B140              | FFPE               | Male          | 78                 | Urothelial carcinoma of the upper urinary tract                            | infiltrating     | C228T                                       |
| B141              | FFPE               | Male          | 61                 | Urothelial carcinoma of the upper urinary tract                            | infiltrating     | C228A                                       |
| B142              | FFPE               | Female        | 80                 | Urothelial carcinoma of the upper urinary tract                            | infiltrating     | C228T                                       |
| B151              | FFPE               | Male          | 69                 | Urothelial carcinoma of the upper urinary tract                            | infiltrating     | None                                        |
| B161              | FFPE               | Female        | 76                 | Urothelial carcinoma of the upper urinary tract                            | infiltrating     | None                                        |
| B162              | FFPE               | Male          | 64                 | Urothelial carcinoma of the upper urinary tract                            | infiltrating     | C228T                                       |
| B178              | FFPE               | Male          | 62                 | Urothelial carcinoma of                                                    | infiltrating     | C250T                                       |

|      |      |        |    |                                                                            |              |       |
|------|------|--------|----|----------------------------------------------------------------------------|--------------|-------|
|      |      |        |    | the upper urinary tract                                                    |              |       |
| B200 | FFPE | Male   | 46 | Urothelial carcinoma of the upper urinary tract                            | infiltrating | None  |
| B204 | FFPE | Female | 57 | Urothelial carcinoma of the upper urinary tract                            | infiltrating | A161C |
| B208 | FFPE | Male   | 50 | Urothelial carcinoma of the upper urinary tract (papillary )               | infiltrating | None  |
| B212 | FFPE | Male   | 79 | Urothelial carcinoma of the upper urinary tract                            | infiltrating | C228T |
| B220 | FFPE | Male   | 75 | Urothelial carcinoma of the upper urinary tract                            | infiltrating | None  |
| B222 | FFPE | Female | 70 | Urothelial carcinoma of the upper urinary tract                            | infiltrating | None  |
| B226 | FFPE | Female | 73 | Urothelial carcinoma of the upper urinary tract (squamous differentiation) | infiltrating | C228T |
| B229 | FFPE | Female | 86 | Urothelial carcinoma of the upper urinary tract                            | infiltrating | C228T |
| B232 | FFPE | Male   | 84 | Urothelial carcinoma of the upper urinary tract                            | infiltrating | C228T |
| B234 | FFPE | Male   | 80 | Urothelial carcinoma of the upper urinary tract                            | infiltrating | C228T |
| B253 | FFPE | Male   | 72 | Urothelial carcinoma of the upper urinary tract                            | non-invasive | C158A |
| B265 | FFPE | Male   | 61 | Urothelial carcinoma of the upper urinary tract                            | infiltrating | C228T |
| B283 | FFPE | Male   | 60 | Urothelial carcinoma of the upper urinary tract                            | non-invasive | C228T |
| B291 | FFPE | Male   | 73 | Urothelial carcinoma of the upper urinary tract                            | infiltrating | G149T |
| B292 | FFPE | Male   | 73 | Urothelial carcinoma of the upper urinary tract                            | infiltrating | A161C |
| B293 | FFPE | Female | 58 | Urothelial carcinoma of the upper urinary tract                            | non-invasive | C228T |
| B294 | FFPE | Male   | 64 | Urothelial carcinoma of the upper urinary tract                            | infiltrating | None  |
| B296 | FFPE | Female | 60 | Urothelial carcinoma of the upper urinary tract                            | infiltrating | C228T |
| B298 | FFPE | Male   | 73 | Urothelial carcinoma of the upper urinary tract                            | non-invasive | C228T |
| B300 | FFPE | Female | 72 | Urothelial carcinoma of the upper urinary tract                            | non-invasive | None  |
| B322 | FFPE | Male   | 75 | Urothelial carcinoma of                                                    | non-invasive | C228T |



|      |      |        |    |                                                 |              |       |
|------|------|--------|----|-------------------------------------------------|--------------|-------|
|      |      |        |    | the upper urinary tract                         |              |       |
| B325 | FFPE | Female | 68 | Urothelial carcinoma of the upper urinary tract | non-invasive | C250T |
| B333 | FFPE | Female | 73 | Urothelial carcinoma of the upper urinary tract | infiltrating | C228T |
| B342 | FFPE | Female | 68 | Urothelial carcinoma of the upper urinary tract | non-invasive | C250T |
| B351 | FFPE | Male   | 55 | Urothelial carcinoma of the upper urinary tract | non-invasive | C228T |
| B355 | FFPE | Male   | 59 | Urothelial carcinoma of the upper urinary tract | infiltrating | C228T |
| B356 | FFPE | Male   | 82 | Urothelial carcinoma of the upper urinary tract | non-invasive | C228T |
| B371 | FFPE | Male   | 56 | Urothelial carcinoma of the upper urinary tract | infiltrating | C228T |
| B75  | FFPE | Male   | 75 | Urothelial carcinoma of the upper urinary tract | infiltrating | C228T |
| B256 | FFPE | Male   | 59 | Urothelial carcinoma of the upper urinary tract | infiltrating | C228T |
| U14  | FFPE | Female | 76 | Urothelial carcinoma of the upper urinary tract | infiltrating | C228T |
| U28  | FFPE | Male   | 76 | Urothelial carcinoma of the upper urinary tract | infiltrating | None  |
| U39  | FFPE | Female | 62 | Urothelial carcinoma of the upper urinary tract | infiltrating | None  |
| U10  | FFPE | Female | 74 | Urothelial carcinoma of the upper urinary tract | infiltrating | None  |
| B330 | FFPE | Male   | 62 | Bladder urothelial carcinoma                    | non-invasive | C228T |
| B258 | FFPE | Female | 83 | Bladder urothelial carcinoma                    | non-invasive | None  |
| B323 | FFPE | Male   | 58 | Bladder urothelial carcinoma                    | non-invasive | C228T |
| B332 | FFPE | Male   | 76 | Bladder urothelial carcinoma                    | non-invasive | C250T |
| B354 | FFPE | Female | 41 | Bladder urothelial carcinoma                    | non-invasive | C250T |
| B1   | FFPE | Male   | 70 | Bladder urothelial carcinoma                    | non-invasive | None  |
| B2   | FFPE | Male   | 68 | Bladder urothelial carcinoma                    | infiltrating | None  |
| B3   | FFPE | Male   | 47 | Bladder papillary urothelial carcinoma          | non-invasive | C228T |
| B4   | FFPE | Male   | 75 | Bladder urothelial carcinoma                    | non-invasive | C228T |

|     |      |        |    |                                        |              |             |
|-----|------|--------|----|----------------------------------------|--------------|-------------|
| B5  | FFPE | Male   | 59 | Bladder urothelial carcinoma           | infiltrating | C242T+C243T |
| B6  | FFPE | Female | 76 | Bladder urothelial carcinoma           | infiltrating | C228T       |
| B8  | FFPE | Male   | 84 | Bladder urothelial carcinoma           | infiltrating | C228T       |
| B9  | FFPE | Male   | 71 | Bladder urothelial carcinoma           | infiltrating | None        |
| B13 | FFPE | Male   | 82 | Bladder urothelial carcinoma           | non-invasive | C228T       |
| B15 | FFPE | Male   | 54 | Bladder urothelial carcinoma           | non-invasive | C228T       |
| B16 | FFPE | Male   | 47 | Bladder urothelial carcinoma           | infiltrating | C228T       |
| B17 | FFPE | Male   | 77 | Bladder urothelial carcinoma           | infiltrating | None        |
| B18 | FFPE | Male   | 60 | Bladder urothelial carcinoma           | infiltrating | C228T       |
| B19 | FFPE | Male   | 53 | Bladder urothelial carcinoma           | non-invasive | None        |
| B20 | FFPE | Male   | 63 | Bladder urothelial carcinoma           | non-invasive | C228T       |
| B21 | FFPE | Male   | 56 | Bladder urothelial carcinoma           | non-invasive | C250T       |
| B23 | FFPE | Female | 65 | Bladder urothelial carcinoma           | non-invasive | C250T       |
| B24 | FFPE | Male   | 73 | Bladder urothelial carcinoma           | non-invasive | None        |
| B25 | FFPE | Male   | 62 | Bladder urothelial carcinoma           | non-invasive | C228T       |
| B27 | FFPE | Male   | 73 | Bladder urothelial carcinoma           | infiltrating | G245A       |
| B28 | FFPE | Male   | 78 | Bladder urothelial carcinoma           | non-invasive | C228T       |
| B29 | FFPE | Male   | 55 | Bladder papillary urothelial carcinoma | non-invasive | C228T       |
| B31 | FFPE | Male   | 80 | Bladder urothelial carcinoma           | infiltrating | C228T       |
| B35 | FFPE | Male   | 57 | Bladder urothelial carcinoma           | non-invasive | None        |
| B36 | FFPE | Female | 52 | Bladder urothelial carcinoma           | non-invasive | C250T       |
| B38 | FFPE | Male   | 65 | Bladder papillary urothelial carcinoma | non-invasive | None        |
| B41 | FFPE | Male   | 83 | Bladder urothelial carcinoma           | infiltrating | C228T       |

|     |      |        |    |                                                                           |              |       |
|-----|------|--------|----|---------------------------------------------------------------------------|--------------|-------|
|     |      |        |    | carcinoma                                                                 |              |       |
| B42 | FFPE | Male   | 71 | Bladder urothelial carcinoma                                              | infiltrating | C250T |
| B43 | FFPE | Male   | 60 | Bladder urothelial carcinoma                                              | infiltrating | C228T |
| B44 | FFPE | Female | 75 | Bladder urothelial carcinoma(squamous differentiation)                    | infiltrating | C228T |
| B45 | FFPE | Male   | 70 | Bladder urothelial carcinoma                                              | infiltrating | C228T |
| B46 | FFPE | Male   | 85 | Bladder urothelial carcinoma                                              | non-invasive | C250T |
| B47 | FFPE | Male   | 62 | Bladder urothelial carcinoma                                              | infiltrating | None  |
| B48 | FFPE | Female | 50 | Bladder urothelial carcinoma                                              | non-invasive | None  |
| B51 | FFPE | Female | 54 | Bladder urothelial carcinoma                                              | non-invasive | C228T |
| B54 | FFPE | Male   | 48 | Bladder papillary urothelial carcinoma                                    | non-invasive | None  |
| B55 | FFPE | Male   | 83 | Bladder urothelial carcinoma(squamous differentiation and nested variant) | infiltrating | C228T |
| B58 | FFPE | Male   | 84 | Bladder urothelial carcinoma                                              | non-invasive | C250T |
| B60 | FFPE | Female | 82 | Bladder urothelial carcinoma                                              | non-invasive | None  |
| B61 | FFPE | Female | 54 | Bladder urothelial carcinoma                                              | non-invasive | C228T |
| B62 | FFPE | Male   | 57 | Bladder urothelial carcinoma                                              | non-invasive | C250T |
| B63 | FFPE | Male   | 53 | Bladder urothelial carcinoma                                              | non-invasive | None  |
| B64 | FFPE | Male   | 77 | Bladder papillary urothelial carcinoma                                    | non-invasive | C228T |
| B66 | FFPE | Male   | 84 | Bladder urothelial carcinoma                                              | infiltrating | C250T |
| B67 | FFPE | Male   | 50 | Bladder papillary urothelial carcinoma                                    | non-invasive | C228T |
| B68 | FFPE | Male   | 55 | Bladder urothelial carcinoma                                              | infiltrating | None  |
| B70 | FFPE | Male   | 37 | Bladder urothelial carcinoma                                              | non-invasive | None  |
| B71 | FFPE | Male   | 62 | Bladder urothelial carcinoma                                              | non-invasive | C228T |

|      |      |        |    |                                        |              |       |
|------|------|--------|----|----------------------------------------|--------------|-------|
|      |      |        |    | carcinoma                              |              |       |
| B74  | FFPE | Male   | 42 | Bladder urothelial carcinoma           | non-invasive | None  |
| B77  | FFPE | Female | 53 | Bladder urothelial carcinoma           | infiltrating | C250T |
| B79  | FFPE | Male   | 80 | Bladder urothelial carcinoma           | infiltrating | C228T |
| B84  | FFPE | Female | 49 | Bladder urothelial carcinoma           | infiltrating | None  |
| B85  | FFPE | Male   | 59 | Bladder papillary urothelial carcinoma | non-invasive | C250T |
| B88  | FFPE | Male   | 47 | Bladder urothelial carcinoma           | infiltrating | C250T |
| B89  | FFPE | Male   | 61 | Bladder urothelial carcinoma           | infiltrating | C228T |
| B91  | FFPE | Female | 80 | Bladder urothelial carcinoma           | non-invasive | None  |
| B92  | FFPE | Male   | 83 | Bladder urothelial carcinoma           | non-invasive | C228T |
| B93  | FFPE | Male   | 56 | Bladder urothelial carcinoma           | non-invasive | C250T |
| B94  | FFPE | Male   | 73 | Bladder urothelial carcinoma           | infiltrating | C228T |
| B95  | FFPE | Male   | 56 | Bladder urothelial carcinoma           | infiltrating | C228T |
| B96  | FFPE | Female | 55 | Bladder urothelial carcinoma           | non-invasive | C228T |
| B97  | FFPE | Male   | 80 | Bladder urothelial carcinoma           | infiltrating | None  |
| B99  | FFPE | Male   | 80 | Bladder urothelial carcinoma           | non-invasive | None  |
| B100 | FFPE | Female | 70 | Bladder urothelial carcinoma           | non-invasive | None  |
| B101 | FFPE | Male   | 60 | Bladder urothelial carcinoma           | infiltrating | C228A |
| B102 | FFPE | Male   | 91 | Bladder urothelial carcinoma           | non-invasive | C228T |
| B105 | FFPE | Male   | 82 | Bladder papillary urothelial carcinoma | infiltrating | None  |
| B106 | FFPE | Male   | 56 | Bladder urothelial carcinoma           | non-invasive | None  |
| B107 | FFPE | Female | 72 | Bladder urothelial carcinoma           | infiltrating | C250T |
| B109 | FFPE | Male   | 65 | Bladder papillary urothelial carcinoma | non-invasive | A161C |

|      |      |        |    |                                                          |              |             |
|------|------|--------|----|----------------------------------------------------------|--------------|-------------|
| B110 | FFPE | Male   | 65 | Bladder urothelial carcinoma                             | infiltrating | C228T       |
| B112 | FFPE | Male   | 69 | Bladder urothelial carcinoma                             | infiltrating | C228T       |
| B113 | FFPE | Male   | 80 | Bladder urothelial carcinoma                             | infiltrating | A161C       |
| B115 | FFPE | Male   | 63 | Bladder urothelial carcinoma                             | infiltrating | C228T       |
| B117 | FFPE | Female | 49 | Bladder urothelial carcinoma                             | non-invasive | C242T+C243T |
| B120 | FFPE | Male   | 80 | Bladder urothelial carcinoma                             | infiltrating | None        |
| B121 | FFPE | Female | 40 | Bladder urothelial carcinoma                             | infiltrating | None        |
| B122 | FFPE | Male   | 78 | Bladder urothelial carcinoma                             | infiltrating | None        |
| B123 | FFPE | Male   | 60 | Bladder urothelial carcinoma                             | non-invasive | C250T       |
| B125 | FFPE | Male   | 51 | Bladder papillary urothelial carcinoma                   | non-invasive | None        |
| B128 | FFPE | Male   | 76 | Bladder papillary urothelial carcinoma                   | infiltrating | C228T       |
| B129 | FFPE | Male   | 53 | Bladder urothelial carcinoma                             | non-invasive | None        |
| B132 | FFPE | Male   | 85 | Bladder urothelial carcinoma                             | infiltrating | C228T       |
| B136 | FFPE | Female | 62 | Bladder urothelial carcinoma                             | infiltrating | None        |
| B137 | FFPE | Male   | 79 | Bladder urothelial carcinoma                             | non-invasive | C228T       |
| B138 | FFPE | Male   | 43 | Bladder urothelial carcinoma(part of inverted papilloma) | non-invasive | None        |
| B139 | FFPE | Male   | 81 | Bladder urothelial carcinoma                             | infiltrating | C250T       |
| B144 | FFPE | Male   | 61 | Bladder urothelial carcinoma                             | infiltrating | None        |
| B145 | FFPE | Male   | 77 | Bladder urothelial carcinoma                             | infiltrating | None        |
| B146 | FFPE | Male   | 79 | Bladder urothelial carcinoma                             | infiltrating | C228T       |
| B147 | FFPE | Male   | 58 | Bladder papillary urothelial carcinoma                   | infiltrating | C228T       |
| B149 | FFPE | Male   | 46 | Bladder urothelial carcinoma                             | infiltrating | C228T       |

|      |      |        |    |                                                          |              |             |
|------|------|--------|----|----------------------------------------------------------|--------------|-------------|
| B150 | FFPE | Male   | 65 | Bladder urothelial carcinoma                             | infiltrating | C228T       |
| B152 | FFPE | Male   | 42 | Bladder urothelial carcinoma                             | non-invasive | C228T       |
| B154 | FFPE | Male   | 53 | Bladder urothelial carcinoma                             | non-invasive | None        |
| B155 | FFPE | Male   | 60 | Bladder urothelial carcinoma                             | non-invasive | A161C       |
| B156 | FFPE | Male   | 61 | Bladder papillary urothelial carcinoma                   | non-invasive | None        |
| B157 | FFPE | Female | 63 | Bladder urothelial carcinoma(part of inverted papilloma) | non-invasive | None        |
| B158 | FFPE | Male   | 73 | Bladder urothelial carcinoma                             | infiltrating | None        |
| B159 | FFPE | Male   | 62 | Bladder papillary urothelial carcinoma                   | non-invasive | C228T       |
| B160 | FFPE | Male   | 73 | Bladder urothelial carcinoma                             | infiltrating | A161C       |
| B163 | FFPE | Male   | 61 | Bladder urothelial carcinoma(squamous differentiation)   | infiltrating | C228T       |
| B164 | FFPE | Male   | 80 | Bladder urothelial carcinoma                             | infiltrating | C228T       |
| B166 | FFPE | Female | 80 | Bladder urothelial carcinoma                             | non-invasive | C242T+C243T |
| B171 | FFPE | Male   | 82 | Bladder urothelial carcinoma                             | non-invasive | None        |
| B176 | FFPE | Male   | 69 | Bladder urothelial carcinoma                             | infiltrating | None        |
| B179 | FFPE | Male   | 80 | Bladder papillary urothelial carcinoma                   | non-invasive | None        |
| B181 | FFPE | Female | 70 | Bladder urothelial carcinoma                             | infiltrating | C228T       |
| B182 | FFPE | Male   | 68 | Bladder urothelial carcinoma                             | infiltrating | C250T       |
| B184 | FFPE | Male   | 88 | Bladder urothelial carcinoma                             | infiltrating | None        |
| B185 | FFPE | Female | 83 | Bladder urothelial carcinoma(micropapillary variant)     | infiltrating | C228T       |
| B186 | FFPE | Female | 59 | Bladder papillary urothelial carcinoma                   | non-invasive | C250T       |
| B187 | FFPE | Male   | 69 | Bladder urothelial carcinoma(squamous differentiation)   | infiltrating | None        |

|      |      |        |    |                                                                  |              |       |
|------|------|--------|----|------------------------------------------------------------------|--------------|-------|
| B189 | FFPE | Female | 73 | Bladder urothelial carcinoma                                     | non-invasive | C228T |
| B190 | FFPE | Male   | 48 | Bladder urothelial carcinoma                                     | non-invasive | None  |
| B191 | FFPE | Male   | 56 | Bladder urothelial carcinoma                                     | infiltrating | C228T |
| B192 | FFPE | Male   | 62 | Bladder urothelial carcinoma                                     | non-invasive | C228T |
| B194 | FFPE | Male   | 59 | Bladder urothelial carcinoma                                     | infiltrating | None  |
| B195 | FFPE | Male   | 70 | Bladder urothelial carcinoma                                     | infiltrating | None  |
| B197 | FFPE | Male   | 77 | Bladder urothelial carcinoma                                     | non-invasive | G149T |
| B198 | FFPE | Male   | 62 | Bladder urothelial carcinoma                                     | infiltrating | C228T |
| B199 | FFPE | Female | 73 | Bladder urothelial carcinoma                                     | non-invasive | None  |
| B201 | FFPE | Male   | 64 | Bladder urothelial carcinoma                                     | infiltrating | C250T |
| B205 | FFPE | Male   | 71 | Bladder urothelial carcinoma(squamous differentiation)           | infiltrating | C228T |
| B207 | FFPE | Female | 60 | Bladder urothelial carcinoma                                     | non-invasive | A161C |
| B209 | FFPE | Male   | 73 | PUNLMP(papillary urothelial neoplasm of low malignant potential) | non-invasive | C250T |
| B210 | FFPE | Male   | 89 | Bladder urothelial carcinoma                                     | non-invasive | C228T |
| B211 | FFPE | Male   | 92 | Bladder urothelial carcinoma                                     | non-invasive | C228T |
| B214 | FFPE | Female | 59 | Bladder urothelial carcinoma                                     | non-invasive | None  |
| B215 | FFPE | Male   | 65 | Bladder urothelial carcinoma                                     | infiltrating | C250T |
| B216 | FFPE | Male   | 61 | Bladder urothelial carcinoma                                     | infiltrating | C228T |
| B217 | FFPE | Male   | 88 | Bladder urothelial carcinoma                                     | infiltrating | C228T |
| B225 | FFPE | Male   | 73 | Bladder urothelial carcinoma                                     | non-invasive | None  |
| B227 | FFPE | Male   | 52 | Bladder urothelial carcinoma                                     | non-invasive | C250T |
| B228 | FFPE | Female | 63 | Bladder urothelial carcinoma                                     | non-invasive | None  |

|      |      |        |    |                                        |              |       |
|------|------|--------|----|----------------------------------------|--------------|-------|
| B230 | FFPE | Male   | 75 | Bladder urothelial carcinoma           | infiltrating | None  |
| B237 | FFPE | Male   | 74 | Bladder papillary urothelial carcinoma | non-invasive | None  |
| B240 | FFPE | Male   | 74 | Bladder urothelial carcinoma           | infiltrating | C228T |
| B241 | FFPE | Female | 78 | Bladder urothelial carcinoma           | non-invasive | C250T |
| B243 | FFPE | Female | 58 | Bladder urothelial carcinoma           | non-invasive | None  |
| B244 | FFPE | Female | 36 | Bladder urothelial carcinoma           | non-invasive | C228T |
| B245 | FFPE | Male   | 49 | Bladder urothelial carcinoma           | non-invasive | C228T |
| B246 | FFPE | Male   | 68 | Bladder urothelial carcinoma           | non-invasive | A161C |
| B247 | FFPE | Male   | 72 | Bladder urothelial carcinoma           | non-invasive | None  |
| B248 | FFPE | Male   | 55 | Bladder urothelial carcinoma           | non-invasive | C228T |
| B249 | FFPE | Female | 84 | Bladder urothelial carcinoma           | non-invasive | C250T |
| B250 | FFPE | Male   | 76 | Bladder urothelial carcinoma           | non-invasive | None  |
| B254 | FFPE | Female | 58 | Bladder papillary urothelial carcinoma | non-invasive | None  |
| B255 | FFPE | Male   | 39 | Bladder urothelial carcinoma           | non-invasive | None  |
| B257 | FFPE | Male   | 77 | Bladder urothelial carcinoma           | infiltrating | C193T |
| B259 | FFPE | Female | 56 | Bladder urothelial carcinoma           | infiltrating | C158A |
| B261 | FFPE | Female | 79 | Bladder urothelial carcinoma           | non-invasive | None  |
| B263 | FFPE | Female | 70 | Bladder urothelial carcinoma           | non-invasive | C228T |
| B266 | FFPE | Male   | 49 | Bladder urothelial carcinoma           | infiltrating | C228T |
| B268 | FFPE | Male   | 78 | Bladder urothelial carcinoma           | non-invasive | C228T |
| B273 | FFPE | Male   | 54 | Bladder urothelial carcinoma           | infiltrating | C228T |
| B274 | FFPE | Male   | 78 | Bladder urothelial carcinoma           | infiltrating | C228T |
| B276 | FFPE | Female | 85 | Bladder urothelial carcinoma           | non-invasive | C158A |



|      |      |        |    |                                                        |              |             |
|------|------|--------|----|--------------------------------------------------------|--------------|-------------|
|      |      |        |    | carcinoma                                              |              |             |
| B277 | FFPE | Male   | 57 | Bladder urothelial carcinoma                           | non-invasive | None        |
| B278 | FFPE | Male   | 54 | Bladder urothelial carcinoma                           | non-invasive | A161C       |
| B279 | FFPE | Male   | 81 | Bladder urothelial carcinoma(squamous differentiation) | infiltrating | None        |
| B280 | FFPE | Female | 78 | Bladder urothelial carcinoma                           | non-invasive | C228T       |
| B281 | FFPE | Male   | 46 | Bladder urothelial carcinoma                           | non-invasive | C250T       |
| B282 | FFPE | Male   | 50 | Bladder urothelial carcinoma                           | non-invasive | C228T       |
| B284 | FFPE | Male   | 70 | Bladder urothelial carcinoma                           | non-invasive | T198G       |
| B285 | FFPE | Male   | 67 | Bladder urothelial carcinoma                           | non-invasive | None        |
| B286 | FFPE | Male   | 82 | Bladder urothelial carcinoma                           | non-invasive | C228T       |
| B288 | FFPE | Male   | 58 | Bladder urothelial carcinoma                           | infiltrating | None        |
| B289 | FFPE | Male   | 78 | Bladder urothelial carcinoma                           | infiltrating | None        |
| B297 | FFPE | Male   | 56 | Bladder urothelial carcinoma                           | non-invasive | C250T       |
| B299 | FFPE | Male   | 52 | Bladder urothelial carcinoma                           | non-invasive | None        |
| B301 | FFPE | Male   | 56 | Bladder urothelial carcinoma                           | non-invasive | None        |
| B302 | FFPE | Male   | 82 | Bladder urothelial carcinoma                           | infiltrating | C228T       |
| B306 | FFPE | Female | 72 | Bladder urothelial carcinoma                           | non-invasive | None        |
| B307 | FFPE | Male   | 80 | Bladder urothelial carcinoma                           | non-invasive | A161C       |
| B308 | FFPE | Female | 52 | Bladder papillary urothelial carcinoma                 | non-invasive | C250T       |
| B309 | FFPE | Female | 66 | Bladder urothelial carcinoma                           | non-invasive | C242T+C243T |
| B310 | FFPE | Male   | 59 | Bladder urothelial carcinoma                           | non-invasive | A161C       |
| B311 | FFPE | Male   | 82 | Bladder urothelial carcinoma                           | infiltrating | C228T       |
| B313 | FFPE | Male   | 78 | Bladder urothelial carcinoma                           | non-invasive | C250T       |

|      |      |        |    |                                        |              |             |
|------|------|--------|----|----------------------------------------|--------------|-------------|
|      |      |        |    | carcinoma                              |              |             |
| B314 | FFPE | Male   | 61 | Bladder urothelial carcinoma           | non-invasive | C184T+C190T |
| B316 | FFPE | Male   | 40 | Bladder urothelial carcinoma           | non-invasive | None        |
| B319 | FFPE | Male   | 69 | Bladder papillary urothelial carcinoma | non-invasive | C250T       |
| B320 | FFPE | Male   | 72 | Bladder urothelial carcinoma           | non-invasive | C250T       |
| B321 | FFPE | Male   | 63 | Bladder urothelial carcinoma           | non-invasive | C228T       |
| B327 | FFPE | Male   | 75 | Bladder urothelial carcinoma           | infiltrating | None        |
| B328 | FFPE | Male   | 65 | Bladder urothelial carcinoma           | infiltrating | C228T       |
| B329 | FFPE | Male   | 49 | Bladder urothelial carcinoma           | infiltrating | C242T+C243T |
| B331 | FFPE | Female | 81 | Bladder urothelial carcinoma           | infiltrating | C228T       |
| B336 | FFPE | Male   | 88 | Bladder urothelial carcinoma           | infiltrating | C228T       |
| B337 | FFPE | Male   | 66 | Bladder urothelial carcinoma           | non-invasive | C228T       |
| B338 | FFPE | Male   | 82 | Bladder urothelial carcinoma           | non-invasive | C250T       |
| B340 | FFPE | Female | 72 | Bladder urothelial carcinoma           | infiltrating | C250T       |
| B341 | FFPE | Male   | 82 | Bladder urothelial carcinoma           | non-invasive | A161C       |
| B343 | FFPE | Female | 59 | Bladder urothelial carcinoma           | non-invasive | C250T       |
| B344 | FFPE | Male   | 69 | Bladder urothelial carcinoma           | non-invasive | C228T       |
| B345 | FFPE | Male   | 80 | Bladder urothelial carcinoma           | non-invasive | C228T       |
| B346 | FFPE | Male   | 76 | Bladder urothelial carcinoma           | non-invasive | None        |
| B348 | FFPE | Male   | 63 | Bladder urothelial carcinoma           | non-invasive | C228T       |
| B349 | FFPE | Male   | 33 | Bladder urothelial carcinoma           | non-invasive | None        |
| B350 | FFPE | Male   | 80 | Bladder papillary urothelial carcinoma | non-invasive | None        |
| B358 | FFPE | Male   | 77 | Bladder urothelial carcinoma           | infiltrating | C228T       |

|      |      |        |    |                                                                  |              |       |
|------|------|--------|----|------------------------------------------------------------------|--------------|-------|
| B359 | FFPE | Male   | 71 | Bladder urothelial carcinoma                                     | infiltrating | C250T |
| B360 | FFPE | Male   | 84 | Bladder urothelial carcinoma                                     | non-invasive | None  |
| B361 | FFPE | Male   | 81 | Bladder urothelial carcinoma                                     | non-invasive | None  |
| B362 | FFPE | Male   | 50 | Bladder urothelial carcinoma                                     | non-invasive | C228T |
| B364 | FFPE | Male   | 35 | Bladder urothelial carcinoma                                     | non-invasive | None  |
| B365 | FFPE | Male   | 75 | Bladder urothelial carcinoma                                     | non-invasive | None  |
| B367 | FFPE | Male   | 69 | Bladder urothelial carcinoma                                     | non-invasive | C228T |
| B368 | FFPE | Male   | 60 | Bladder urothelial carcinoma                                     | non-invasive | None  |
| B370 | FFPE | Male   | 85 | Bladder urothelial carcinoma                                     | non-invasive | None  |
| B372 | FFPE | Female | 54 | Bladder urothelial carcinoma                                     | infiltrating | C228T |
| B373 | FFPE | Male   | 88 | Bladder urothelial carcinoma                                     | non-invasive | None  |
| B374 | FFPE | Female | 85 | Bladder urothelial carcinoma                                     | non-invasive | None  |
| B376 | FFPE | Male   | 58 | Bladder urothelial carcinoma                                     | non-invasive | None  |
| B231 | FFPE | Male   | 68 | Bladder urothelial carcinoma                                     | non-invasive | None  |
| U3   | FFPE | Male   | 78 | Bladder urothelial carcinoma(part of inverted papilloma)         | non-invasive | None  |
| U4   | FFPE | Male   | 80 | Bladder papillary urothelial carcinoma                           | non-invasive | C250T |
| U6   | FFPE | Female | 79 | Bladder urothelial carcinoma                                     | non-invasive | None  |
| U11  | FFPE | Female | 67 | PUNLMP(papillary urothelial neoplasm of low malignant potential) | non-invasive | None  |
| U12  | FFPE | Male   | 88 | Bladder urothelial carcinoma                                     | infiltrating | None  |
| U13  | FFPE | Male   | 87 | Bladder urothelial carcinoma (squamous differentiation)          | infiltrating | C228T |
| U18  | FFPE | Male   | 63 | Bladder urothelial carcinoma                                     | infiltrating | C228T |

|     |      |        |    |                                                           |              |                   |
|-----|------|--------|----|-----------------------------------------------------------|--------------|-------------------|
| U19 | FFPE | Male   | 67 | Bladder urothelial carcinoma                              | non-invasive | C228T             |
| U21 | FFPE | Male   | 72 | Bladder urothelial carcinoma (part of inverted papilloma) | non-invasive | None              |
| U23 | FFPE | Male   | 63 | Bladder urothelial carcinoma                              | infiltrating | None              |
| U24 | FFPE | Male   | 78 | Bladder urothelial carcinoma                              | non-invasive | C228T             |
| U25 | FFPE | Female | 84 | Bladder urothelial carcinoma                              | non-invasive | C250T             |
| U27 | FFPE | Female | 74 | Bladder papillary urothelial carcinoma                    | non-invasive | None              |
| U29 | FFPE | Female | 71 | Bladder urothelial carcinoma                              | infiltrating | None              |
| U32 | FFPE | Male   | 54 | Bladder urothelial carcinoma                              | infiltrating | None              |
| U36 | FFPE | Male   | 47 | Bladder urothelial carcinoma                              | non-invasive | None              |
| U37 | FFPE | Female | 83 | Bladder urothelial carcinoma                              | non-invasive | None              |
| U38 | FFPE | Male   | 77 | Bladder urothelial carcinoma                              | infiltrating | None              |
| U42 | FFPE | Male   | 79 | Bladder papillary urothelial carcinoma                    | non-invasive | C250T+C242T+C243T |

C. Hepatobiliary tumors: n=47

**Patients evaluated for *TERT* promoter mutations**

| <b>Sample ID#</b> | <b>Tissue type</b> | <b>Gender</b> | <b>Age (years)</b> | <b>Tumor Type</b> | <b>Edmondson Grade</b> | <b><i>TERT</i> promoter mutation</b> |
|-------------------|--------------------|---------------|--------------------|-------------------|------------------------|--------------------------------------|
|-------------------|--------------------|---------------|--------------------|-------------------|------------------------|--------------------------------------|

|     |              |        |    |                          |     |       |
|-----|--------------|--------|----|--------------------------|-----|-------|
| H19 | Fresh sample | Male   | 59 | Hepatocellular carcinoma | II  | C228T |
| H23 | Fresh sample | Male   | 54 | Hepatocellular carcinoma | I   | None  |
| H37 | Fresh sample | Female | 57 | Hepatocellular carcinoma | IV  | None  |
| H61 | Fresh sample | Male   | 55 | Hepatocellular carcinoma | II  | None  |
| H53 | Fresh sample | Female | 67 | Hepatocellular carcinoma | II  | None  |
| H67 | Fresh sample | Male   | 71 | Hepatocellular carcinoma | II  | None  |
| H33 | Fresh sample | Male   | 52 | Hepatocellular carcinoma | II  | C250T |
| H41 | Fresh sample | Female | 58 | Hepatocellular carcinoma | II  | None  |
| H49 | Fresh sample | Male   | 66 | Hepatocellular carcinoma | II  | C228T |
| H59 | Fresh sample | Male   | 73 | Hepatocellular carcinoma | II  | None  |
| H57 | Fresh sample | Male   | 61 | Hepatocellular carcinoma | II  | None  |
| H81 | Fresh sample | Male   | 50 | Hepatocellular carcinoma | II  | None  |
| H3  | Fresh sample | Female | 51 | Hepatocellular carcinoma | III | None  |
| H47 | Fresh sample | Male   | 51 | Hepatocellular carcinoma | II  | C228T |
| H96 | Fresh sample | Male   | 44 | Hepatocellular carcinoma | II  | None  |
| H83 | Fresh sample | Male   | 76 | Hepatocellular carcinoma | I   | None  |
| H17 | Fresh sample | Male   | 45 | Hepatocellular carcinoma | II  | None  |
| H71 | Fresh sample | Female | 49 | Hepatocellular carcinoma | II  | None  |
| H29 | Fresh sample | Male   | 62 | Hepatocellular carcinoma | II  | C228T |
| H43 | Fresh sample | Male   | 44 | Hepatocellular carcinoma | III | None  |
| H35 | Fresh sample | Male   | 39 | Hepatocellular carcinoma | III | None  |
| H97 | Fresh sample | Male   | 64 | Hepatocellular carcinoma | III | C228T |
| H65 | Fresh        | Male   | 75 | Hepatocellular           | II  | None  |

|     | sample       |        |    | carcinoma                                              |                            |       |
|-----|--------------|--------|----|--------------------------------------------------------|----------------------------|-------|
| H1  | Fresh sample | Male   | 66 | Hepatocellular carcinoma                               | II                         | C228T |
| H15 | Fresh sample | Male   | 60 | Hepatocellular carcinoma                               | III                        | None  |
| H25 | Fresh sample | Male   | 45 | Hepatocellular carcinoma                               | II                         | C228T |
| H27 | Fresh sample | Male   | 55 | Hepatocellular carcinoma                               | II                         | None  |
| H21 | Fresh sample | Male   | 47 | Hepatocellular carcinoma                               | II                         | None  |
| H89 | Fresh sample | Male   | 64 | Hepatocellular carcinoma                               | II                         | C228T |
| H75 | Fresh sample | Male   | 57 | Hepatocellular carcinoma                               | III                        | None  |
| H73 | Fresh sample | Male   | 48 | Hepatocellular carcinoma                               | II                         | None  |
| H7  | Fresh sample | Male   | 52 | Hepatocellular carcinoma                               | II                         | None  |
| H6  | Fresh sample | Male   | 61 | Hepatocellular carcinoma                               | II                         | C228T |
| H11 | Fresh sample | Female | 44 | Hepatocellular carcinoma                               | II                         | None  |
| H92 | Fresh sample | Male   | 50 | Hepatocellular carcinoma                               | II                         | C250T |
| H45 | Fresh sample | Female | 68 | Intrahepatic lymphoepithelioma-like cholangiocarcinoma | High differentiation       | None  |
| H63 | Fresh sample | Male   | 68 | Intrahepatic cholangiocarcinoma                        | High differentiation       | None  |
| H55 | Fresh sample | Male   | 55 | Intrahepatic cholangiocarcinoma                        | Moderately differentiation | None  |
| H69 | Fresh sample | Male   | 20 | Hepatoblastoma                                         | NR                         | None  |
| H91 | Fresh sample | Male   | 52 | Gallbladder carcinoma                                  | Poor differentiation       | None  |
| H87 | Fresh sample | Female | 62 | Gallbladder carcinoma                                  | Moderate differentiation   | C228T |
| H85 | Fresh sample | Female | 70 | Cholangiocarcinoma                                     | Moderate differentiation   | None  |
| H31 | Fresh sample | Female | 74 | Cholangiocarcinoma                                     | Moderate differentiation   | None  |
| H77 | Fresh sample | Female | 65 | Cholangiocarcinoma                                     | Moderate differentiation   | None  |
| H79 | Fresh        | Female | 77 | Cholangiocarcinoma                                     | Moderate                   | None  |

|     | sample       |        |    |                    | differentiation          |      |
|-----|--------------|--------|----|--------------------|--------------------------|------|
| H94 | Fresh sample | Female | 60 | Cholangiocarcinoma | Moderate differentiation | None |
| H95 | Fresh sample | Female | 53 | Cholangiocarcinoma | Moderate differentiation | None |

**D. Gastric tumors: 74 gastric cancer, 82 other gastric tumors (GIST, leiomyoma, schwannoma), total n=156**

**Patients evaluated for *TERT* promoter mutations**

| <b>Sample ID#</b> | <b>Tissue type</b> | <b>Gender</b> | <b>Age (years)</b> | <b>Tumor Type</b> | <b>Lauren classification</b> | <b><i>TERT</i> promoter mutation</b> |
|-------------------|--------------------|---------------|--------------------|-------------------|------------------------------|--------------------------------------|
| 1GF               | Fresh sample       | Male          | 50                 | Gastric Cancer    | Intestinal type              | None                                 |
| 2GF               | Fresh sample       | Female        | 43                 | Gastric Cancer    | Diffuse type                 | None                                 |
| 3GF               | Fresh sample       | Male          | 73                 | Gastric Cancer    | Intestinal type              | None                                 |
| 4GF               | Fresh sample       | Male          | 79                 | Gastric Cancer    | Intestinal type              | None                                 |
| 5GF               | Fresh sample       | Male          | 80                 | Gastric Cancer    | Intestinal type              | None                                 |
| 6GF               | Fresh sample       | Male          | 60                 | Gastric Cancer    | Diffuse type                 | None                                 |
| 7GF               | Fresh sample       | Male          | 62                 | Gastric Cancer    | Intestinal type              | None                                 |
| 8GF               | Fresh sample       | Male          | 66                 | Gastric Cancer    | Diffuse type                 | None                                 |
| 9GF               | Fresh sample       | Male          | 70                 | Gastric Cancer    | Diffuse type                 | None                                 |
| 10GF              | Fresh sample       | Female        | 75                 | Gastric Cancer    | Diffuse type                 | None                                 |
| 11GF              | Fresh sample       | Female        | 64                 | Gastric Cancer    | Diffuse type                 | None                                 |
| 12GF              | Fresh sample       | Male          | 67                 | Gastric Cancer    | Diffuse type                 | None                                 |
| 14GF              | Fresh sample       | Male          | 79                 | Gastric Cancer    | Diffuse type                 | None                                 |
| 15GF              | Fresh sample       | Male          | 66                 | Gastric Cancer    | Intestinal type              | None                                 |
| 16GF              | Fresh sample       | Female        | 51                 | Gastric Cancer    | Diffuse type                 | None                                 |
| 18GF              | Fresh sample       | Male          | 71                 | Gastric Cancer    | Intestinal type              | None                                 |
| 19GF              | Fresh sample       | Male          | 51                 | Gastric Cancer    | Diffuse type                 | None                                 |
| 20GF              | Fresh              | Male          | 62                 | Gastric Cancer    | Intestinal type              | None                                 |



|      |              |        |    |                |                 |      |
|------|--------------|--------|----|----------------|-----------------|------|
|      | sample       |        |    |                |                 |      |
| 21GF | Fresh sample | Male   | 55 | Gastric Cancer | Intestinal type | None |
| 22GF | Fresh sample | Male   | 58 | Gastric Cancer | Diffuse type    | None |
| 23GF | Fresh sample | Male   | 82 | Gastric Cancer | Intestinal type | None |
| 24GF | Fresh sample | Female | 86 | Gastric Cancer | Intestinal type | None |
| 25GF | Fresh sample | Female | 42 | Gastric Cancer | Diffuse type    | None |
| 26GF | Fresh sample | Male   | 68 | Gastric Cancer | Diffuse type    | None |
| 27GF | Fresh sample | Male   | 41 | Gastric Cancer | Diffuse type    | None |
| 28GF | Fresh sample | Male   | 68 | Gastric Cancer | Diffuse type    | None |
| 29GF | Fresh sample | Female | 79 | Gastric Cancer | Diffuse type    | None |
| 30GF | Fresh sample | Male   | 78 | Gastric Cancer | Diffuse type    | None |
| 31GF | Fresh sample | Female | 47 | Gastric Cancer | Intestinal type | None |
| 32GF | Fresh sample | Male   | 75 | Gastric Cancer | Diffuse type    | None |
| 33GF | Fresh sample | Male   | 59 | Gastric Cancer | Intestinal type | None |
| 34GF | Fresh sample | Female | 52 | Gastric Cancer | Diffuse type    | None |
| 35GF | Fresh sample | Female | 75 | Gastric Cancer | Intestinal type | None |
| 36GF | Fresh sample | Male   | 63 | Gastric Cancer | Diffuse type    | None |
| 37GF | Fresh sample | Male   | 65 | Gastric Cancer | Diffuse type    | None |
| 38GF | Fresh sample | Male   | 57 | Gastric Cancer | Diffuse type    | None |
| 39GF | Fresh sample | Male   | 66 | Gastric Cancer | Diffuse type    | None |
| 40GF | Fresh sample | Male   | 70 | Gastric Cancer | Diffuse type    | None |
| 41GF | Fresh sample | Female | 76 | Gastric Cancer | Diffuse type    | None |
| 42GF | Fresh sample | Male   | 61 | Gastric Cancer | Intestinal type | None |

|      |              |        |    |                |                 |      |
|------|--------------|--------|----|----------------|-----------------|------|
| 43GF | Fresh sample | Male   | 66 | Gastric Cancer | Intestinal type | None |
| 44GF | Fresh sample | Female | 46 | Gastric Cancer | Diffuse type    | None |
| 45GF | Fresh sample | Female | 71 | Gastric Cancer | Diffuse type    | None |
| 46GF | Fresh sample | Male   | 75 | Gastric Cancer | Intestinal type | None |
| 47GF | Fresh sample | Female | 39 | Gastric Cancer | Diffuse type    | None |
| 48GF | Fresh sample | Male   | 83 | Gastric Cancer | Diffuse type    | None |
| 49GF | Fresh sample | Male   | 60 | Gastric Cancer | Diffuse type    | None |
| 50GF | Fresh sample | Female | 78 | Gastric Cancer | Intestinal type | None |
| 51GF | Fresh sample | Male   | 55 | Gastric Cancer | Diffuse type    | None |
| 52GF | Fresh sample | Male   | 77 | Gastric Cancer | Intestinal type | None |
| 53GF | Fresh sample | Male   | 78 | Gastric Cancer | Diffuse type    | None |
| 54GF | Fresh sample | Male   | 63 | Gastric Cancer | Intestinal type | None |
| 55GF | Fresh sample | Female | 48 | Gastric Cancer | Intestinal type | None |
| 57GF | Fresh sample | Female | 64 | Gastric Cancer | Diffuse type    | None |
| 58GF | Fresh sample | Male   | 49 | Gastric Cancer | Diffuse type    | None |
| 59GF | Fresh sample | Male   | 71 | Gastric Cancer | Diffuse type    | None |
| 60GF | Fresh sample | Male   | 49 | Gastric Cancer | Intestinal type | None |
| 62GF | Fresh sample | Female | 62 | Gastric Cancer | Intestinal type | None |
| 63GF | Fresh sample | Male   | 69 | Gastric Cancer | Intestinal type | None |
| 64GF | Fresh sample | Male   | 60 | Gastric Cancer | Intestinal type | None |
| 65GF | Fresh sample | Male   | 70 | Gastric Cancer | Diffuse type    | None |
| 66GF | Fresh sample | Female | 68 | Gastric Cancer | Diffuse type    | None |
| 67GF | Fresh sample | Female | 77 | Gastric Cancer | Intestinal type | None |

|      |              |        |    |                |                 |      |
|------|--------------|--------|----|----------------|-----------------|------|
|      | sample       |        |    |                |                 |      |
| 68GF | Fresh sample | Male   | 66 | Gastric Cancer | Diffuse type    | None |
| 69GF | Fresh sample | Female | 79 | Gastric Cancer | Diffuse type    | None |
| 70GF | Fresh sample | Male   | 74 | Gastric Cancer | Diffuse type    | None |
| 72GF | Fresh sample | Female | 49 | Gastric Cancer | Diffuse type    | None |
| 73GF | Fresh sample | Female | 70 | Gastric Cancer | Diffuse type    | None |
| 74GF | Fresh sample | Male   | 56 | Gastric Cancer | Intestinal type | None |
| 76GF | Fresh sample | Male   | 56 | Gastric Cancer | Diffuse type    | None |
| 77GF | Fresh sample | Male   | 62 | Gastric Cancer | Intestinal type | None |
| 78GF | Fresh sample | Female | 60 | Gastric Cancer | Diffuse type    | None |
| 79GF | Fresh sample | Male   | 75 | Gastric Cancer | Diffuse type    | None |
| 56GF | Fresh sample | Male   | 66 | Gastric Cancer | Diffuse type    | None |

| <b>Sample ID#</b> | <b>Tissue type</b> | <b>Gender</b> | <b>Age (years)</b> | <b>Tumor Type</b> | <b>Risk</b> | <b><i>TERT</i> promoter mutation</b> |
|-------------------|--------------------|---------------|--------------------|-------------------|-------------|--------------------------------------|
| JF15              | Fresh sample       | Female        | 59                 | GIST              | Low         | None                                 |
| JF2               | Fresh sample       | Female        | 54                 | GIST              | Low         | None                                 |
| JF10              | Fresh sample       | Male          | 56                 | GIST              | Low         | None                                 |
| JF13              | Fresh sample       | Male          | 64                 | GIST              | Very-low    | None                                 |
| JF14              | Fresh sample       | Female        | 46                 | GIST              | Low         | None                                 |
| JF8               | Fresh sample       | Female        | 56                 | GIST              | High        | None                                 |
| JF1               | Fresh sample       | Male          | 67                 | GIST              | Low         | None                                 |

|      |              |        |    |      |          |      |
|------|--------------|--------|----|------|----------|------|
| JF12 | Fresh sample | Female | 56 | GIST | High     | None |
| HF51 | Fresh sample | Female | 50 | GIST | High     | None |
| JP60 | FFPE         | Male   | 60 | GIST | High     | None |
| JP61 | FFPE         | Female | 36 | GIST | Very-low | None |
| JP64 | FFPE         | Male   | 66 | GIST | Low      | None |
| JP56 | FFPE         | Female | 65 | GIST | Low      | None |
| JP62 | FFPE         | Male   | 53 | GIST | High     | None |
| JP67 | FFPE         | Female | 70 | GIST | Low      | None |
| JP70 | FFPE         | Female | 54 | GIST | Moderate | None |
| JP42 | FFPE         | Male   | 73 | GIST | Very-low | None |
| JP68 | FFPE         | Male   | 58 | GIST | Very-low | None |
| JP53 | FFPE         | Male   | 65 | GIST | Moderate | None |
| JP71 | FFPE         | Male   | 67 | GIST | Low      | None |
| JP59 | FFPE         | Female | 68 | GIST | Very-low | None |
| JP58 | FFPE         | Male   | 60 | GIST | Low      | None |
| JP54 | FFPE         | Male   | 49 | GIST | High     | None |
| JP52 | FFPE         | Female | 45 | GIST | Moderate | None |
| JP57 | FFPE         | Female | 50 | GIST | Low      | None |
| JP51 | FFPE         | Male   | 55 | GIST | Very-low | None |
| JP65 | FFPE         | Female | 50 | GIST | High     | None |
| JP37 | FFPE         | Male   | 56 | GIST | Moderate | None |
| JP47 | FFPE         | Female | 69 | GIST | Low      | None |
| JP46 | FFPE         | Female | 34 | GIST | Low      | None |
| JP45 | FFPE         | Male   | 43 | GIST | Low      | None |
| JP49 | FFPE         | Female | 46 | GIST | Moderate | None |
| JP38 | FFPE         | Female | 67 | GIST | Moderate | None |
| JP50 | FFPE         | Female | 38 | GIST | High     | None |
| JP44 | FFPE         | Male   | 69 | GIST | High     | None |
| JP55 | FFPE         | Male   | 66 | GIST | Low      | None |
| JP28 | FFPE         | Male   | 43 | GIST | Low      | None |
| JP24 | FFPE         | Male   | 48 | GIST | High     | None |
| JP21 | FFPE         | Female | 49 | GIST | Low      | None |
| JP25 | FFPE         | Male   | 71 | GIST | Low      | None |
| JP2  | FFPE         | Female | 83 | GIST | low      | None |
| JP20 | FFPE         | Female | 43 | GIST | Low      | None |
| JP7  | FFPE         | Female | 31 | GIST | Moderate | None |
| JP1  | FFPE         | Male   | 84 | GIST | Low      | None |
| JP32 | FFPE         | Female | 52 | GIST | Very-low | None |
| JP22 | FFPE         | Male   | 69 | GIST | Low      | None |
| JP36 | FFPE         | Male   | 41 | GIST | High     | None |

|      |      |        |    |                            |          |      |
|------|------|--------|----|----------------------------|----------|------|
| JP43 | FFPE | Male   | 58 | GIST                       | Low      | None |
| JP40 | FFPE | Male   | 50 | GIST                       | Very-low | None |
| JP41 | FFPE | Female | 30 | GIST                       | Low      | None |
| JP26 | FFPE | Female | 38 | GIST                       | Moderate | None |
| JP5  | FFPE | Male   | 73 | GIST                       | Low      | None |
| JP17 | FFPE | Female | 56 | GIST                       | Low      | None |
| JP30 | FFPE | Female | 43 | GIST                       | Very-low | None |
| JP11 | FFPE | Female | 63 | GIST                       | Moderate | None |
| JP6  | FFPE | Female | 56 | GIST                       | Very-low | None |
| JP29 | FFPE | Female | 53 | GIST                       | Low      | None |
| JP14 | FFPE | Male   | 57 | GIST                       | Low      | None |
| JP34 | FFPE | Male   | 78 | GIST                       | Low      | None |
| JP13 | FFPE | Male   | 71 | GIST                       | Low      | None |
| JP31 | FFPE | Male   | 52 | GIST                       | Low      | None |
| JP18 | FFPE | Female | 45 | GIST                       | High     | None |
| JP16 | FFPE | Male   | 49 | GIST                       | Low      | None |
| JP35 | FFPE | Female | 64 | GIST                       | Moderate | None |
| JP9  | FFPE | Male   | 69 | GIST                       | Low      | None |
| JP8  | FFPE | Male   | 41 | GIST                       | Moderate | None |
| JP10 | FFPE | Male   | 58 | GIST                       | Low      | None |
| JP19 | FFPE | Male   | 50 | GIST                       | Low      | None |
| JP3  | FFPE | Female | 30 | GIST                       | Very-low | None |
| JP4  | FFPE | Female | 38 | GIST                       | Moderate | None |
| JP15 | FFPE | Male   | 73 | GIST                       | Very-low | None |
| JP27 | FFPE | Female | 56 | GIST                       | Low      | None |
| JP23 | FFPE | Female | 43 | GIST                       | Low      | None |
| JP12 | FFPE | Female | 56 | GIST                       | Low      | None |
| JP39 | FFPE | Female | 43 | GIST                       | Low      | None |
| JP33 | FFPE | Female | 56 | GIST                       | Low      | None |
| JP66 | FFPE | Male   | 32 | Gastrointestinal leiomyoma |          | None |
| JP48 | FFPE | Male   | 69 | Gastrointestinal leiomyoma |          | None |
| JP63 | FFPE | Female | 43 | Gastrointestinal leiomyoma |          | None |
| JP69 | FFPE | Male   | 52 | Gastrointestinal leiomyoma |          | None |
| JF6  | FFPE | Male   | 27 | Gastrointestinal leiomyoma |          | None |
| JF4  | FFPE | Female | 60 | Gastric schwannoma         |          | None |

**E. Pancreatic cancer: n= 46**

**Patients evaluated for *TERT* promoter mutations**

| <b>Sample ID#</b> | <b>Tissue type</b> | <b>Gender</b> | <b>Age (years)</b> | <b>Tumor Type</b> | <b>Lauren classification</b> | <b><i>TERT</i> promoter mutation</b> |
|-------------------|--------------------|---------------|--------------------|-------------------|------------------------------|--------------------------------------|
| P1                | FFPE               | Female        | 49                 | Pancreatic cancer | High                         | None                                 |
| P2                | FFPE               | Male          | 50                 | Pancreatic cancer | Low                          | None                                 |
| P3                | FFPE               | Female        | 88                 | Pancreatic cancer | High                         | None                                 |
| P4                | FFPE               | Male          | 64                 | Pancreatic cancer | Moderate                     | None                                 |
| P5                | FFPE               | Male          | 61                 | Pancreatic cancer | Low                          | None                                 |
| P6                | FFPE               | Male          | 65                 | Pancreatic cancer | Low                          | None                                 |
| P7                | FFPE               | Female        | 76                 | Pancreatic cancer | Moderate                     | None                                 |
| P8                | FFPE               | Male          | 76                 | Pancreatic cancer | Low                          | None                                 |
| P9                | FFPE               | Male          | 72                 | Pancreatic cancer | Moderate                     | None                                 |
| P10               | FFPE               | Male          | 59                 | Pancreatic cancer | Low                          | None                                 |
| P11               | FFPE               | Female        | 63                 | Pancreatic cancer | Moderate                     | None                                 |
| P12               | FFPE               | Male          | 62                 | Pancreatic cancer | High                         | None                                 |
| P13               | FFPE               | Female        | 45                 | Pancreatic cancer | Low                          | None                                 |
| P14               | FFPE               | Male          | 73                 | Pancreatic cancer | Moderate                     | None                                 |
| P15               | FFPE               | Female        | 47                 | Pancreatic cancer | Moderate                     | None                                 |
| P16               | FFPE               | Male          | 66                 | Pancreatic cancer | Moderate                     | None                                 |
| P17               | FFPE               | Male          | 72                 | Pancreatic cancer | Moderate                     | None                                 |
| P19               | FFPE               | Male          | 53                 | Pancreatic cancer | Moderate                     | None                                 |
| P20               | FFPE               | Female        | 64                 | Pancreatic cancer | Moderate                     | None                                 |
| P21               | FFPE               | Female        | 66                 | Pancreatic cancer | Low                          | None                                 |
| P22               | FFPE               | Male          | 68                 | Pancreatic cancer | Low                          | None                                 |
| P23               | FFPE               | Female        | 84                 | Pancreatic cancer | High                         | None                                 |
| P24               | FFPE               | Female        | 74                 | Pancreatic cancer | High                         | None                                 |
| P25               | FFPE               | Male          | 78                 | Pancreatic cancer | High                         | None                                 |
| P26               | FFPE               | Female        | 79                 | Pancreatic cancer | High                         | None                                 |
| P27               | FFPE               | Female        | 60                 | Pancreatic cancer | Moderate                     | None                                 |
| P28               | FFPE               | Male          | 61                 | Pancreatic cancer | High                         | None                                 |
| P29               | FFPE               | Female        | 77                 | Pancreatic cancer | Moderate                     | None                                 |
| P30               | FFPE               | Male          | 76                 | Pancreatic cancer | Low                          | None                                 |
| P31               | FFPE               | Female        | 44                 | Pancreatic cancer | High                         | None                                 |
| P32               | FFPE               | Female        | 63                 | Pancreatic cancer | Low                          | None                                 |
| P33               | FFPE               | Male          | 54                 | Pancreatic cancer | High                         | None                                 |
| P34               | FFPE               | Male          | 65                 | Pancreatic cancer | Moderate                     | None                                 |
| P35               | FFPE               | Male          | 61                 | Pancreatic cancer | Low                          | None                                 |

|     |      |        |    |                   |          |      |
|-----|------|--------|----|-------------------|----------|------|
| P36 | FFPE | Female | 55 | Pancreatic cancer | Low      | None |
| P37 | FFPE | Female | 65 | Pancreatic cancer | Moderate | None |
| P38 | FFPE | Female | 51 | Pancreatic cancer | Moderate | None |
| P39 | FFPE | Female | 55 | Pancreatic cancer | Low      | None |
| P43 | FFPE | Female | 66 | Pancreatic cancer | Moderate | None |
| P41 | FFPE | Male   | 71 | Pancreatic cancer | Low      | None |
| P42 | FFPE | Female | 41 | Pancreatic cancer | Moderate | None |
| P43 | FFPE | Female | 74 | Pancreatic cancer | Moderate | None |
| 75C | FFPE | Male   | 60 | Pancreatic cancer | Moderate | None |
| 61C | FFPE | Male   | 73 | Pancreatic cancer | Low      | None |
| 13C | FFPE | Female | 68 | Pancreatic cancer | Moderate | None |
| 71C | FFPE | Male   | 67 | Pancreatic cancer | Low      | None |

**F. Tumors of the thymus, n= 54**

**Patients evaluated for *TERT* promoter mutations**

| <b>Sample ID#</b> | <b>Tissue type</b> | <b>Gender</b> | <b>Age (years)</b> | <b>Tumor Type</b> | <b>WHO classification</b> | <b><i>TERT</i> promoter mutation</b> |
|-------------------|--------------------|---------------|--------------------|-------------------|---------------------------|--------------------------------------|
| X1                | FFPE               | Male          | 27                 | Thymoma           | Type B1                   | None                                 |
| X2                | FFPE               | Male          | 30                 | Thymoma           | Type A                    | None                                 |
| X3                | FFPE               | Male          | 49                 | Thymoma           | Type B2                   | None                                 |
| X4                | FFPE               | Female        | 70                 | Thymoma           | Type AB                   | None                                 |
| X5                | FFPE               | Female        | 55                 | Thymoma           | Type B1                   | None                                 |
| X6                | FFPE               | Female        | 25                 | Thymoma           | Type A                    | None                                 |
| X7                | FFPE               | Male          | 51                 | Thymoma           | Type B1                   | None                                 |
| X8                | FFPE               | Female        | 82                 | Thymoma           | Type AB                   | None                                 |
| X9                | FFPE               | Female        | 75                 | Thymic Cancer     | Type C                    | None                                 |
| X10               | FFPE               | Male          | 61                 | Thymoma           | Type B1                   | None                                 |
| X11               | FFPE               | Female        | 51                 | Thymoma           | Type AB                   | None                                 |
| X12               | FFPE               | Male          | 44                 | Thymoma           | Type B1                   | None                                 |
| X13               | FFPE               | Female        | 24                 | Thymoma           | Type AB                   | None                                 |
| X14               | FFPE               | Female        | 24                 | Thymoma           | Type B1                   | None                                 |
| X15               | FFPE               | Male          | 13                 | Thymoma           | Type B1                   | None                                 |
| X16               | FFPE               | Female        | 41                 | Thymoma           | Type A                    | None                                 |
| X17               | FFPE               | Female        | 38                 | Thymoma           | Type A                    | None                                 |
| X18               | FFPE               | Female        | 66                 | Thymoma           | Type A                    | None                                 |
| X19               | FFPE               | Female        | 65                 | Thymoma           | Type A                    | None                                 |
| X20               | FFPE               | Male          | 62                 | Thymoma           | Type AB                   | None                                 |
| X21               | FFPE               | Male          | 41                 | Thymoma           | Type B1                   | None                                 |
| X22               | FFPE               | Male          | 57                 | Thymoma           | Type B2                   | None                                 |
| X23               | FFPE               | Male          | 46                 | Thymoma           | Type B1                   | None                                 |
| X24               | FFPE               | Male          | 62                 | Thymoma           | Type B1                   | None                                 |
| X25               | FFPE               | Female        | 53                 | Thymoma           | Type B1                   | None                                 |
| X26               | FFPE               | Male          | 62                 | Thymoma           | Type B1                   | None                                 |
| X27               | FFPE               | Male          | 46                 | Thymoma           | Type B1                   | None                                 |
| X28               | FFPE               | Female        | 53                 | Thymoma           | Type B1                   | None                                 |
| X29               | FFPE               | Female        | 61                 | Thymoma           | Type B2                   | None                                 |
| X30               | FFPE               | Male          | 81                 | Thymoma           | Type A                    | None                                 |
| X31               | FFPE               | Male          | 66                 | Thymoma           | Type B3                   | None                                 |
| X32               | FFPE               | Male          | 58                 | Thymoma           | Type AB                   | None                                 |
| X33               | FFPE               | Male          | 43                 | Thymoma           | Type AB                   | None                                 |
| X34               | FFPE               | Female        | 15                 | Thymoma           | Type B1                   | None                                 |



|     |      |        |    |                                       |                       |      |
|-----|------|--------|----|---------------------------------------|-----------------------|------|
| X35 | FFPE | Male   | 32 | Thymic<br>Neuroendocrine<br>Carcinoma | Atypical<br>carcinoid | None |
| X36 | FFPE | Male   | 61 | Thymic<br>Neuroendocrine<br>Carcinoma | Atypical<br>carcinoid | None |
| X37 | FFPE | Male   | 58 | Thymoma                               | Type AB               | None |
| X38 | FFPE | Female | 50 | Thymoma                               | Type AB               | None |
| X39 | FFPE | Female | 52 | Thymoma                               | Type B1               | None |
| X40 | FFPE | Male   | 54 | Thymoma                               | Type B2               | None |
| X41 | FFPE | Female | 47 | Thymoma                               | Type AB               | None |
| X42 | FFPE | Female | 70 | Thymic Cancer                         | Type C                | None |
| X43 | FFPE | Female | 70 | Thymic Cancer                         | Type C                | None |
| X44 | FFPE | Female | 62 | Thymoma                               | Type AB               | None |
| X45 | FFPE | Female | 62 | Thymoma                               | Type AB               | None |
| X46 | FFPE | Male   | 23 | Thymoma                               | Type B3               | None |
| X47 | FFPE | Male   | 78 | Thymic Cancer                         | Type C                | None |
| X48 | FFPE | Female | 57 | Thymic Cancer                         | Type C                | None |
| X49 | FFPE | Female | 50 | Thymoma                               | Type B2               | None |
| X50 | FFPE | Male   | 60 | Thymoma                               | Type AB               | None |
| X51 | FFPE | Female | 82 | Thymoma                               | Type B2               | None |
| X52 | FFPE | Male   | 45 | Thymoma                               | Type B2               | None |
| X53 | FFPE | Male   | 57 | Thymoma                               | Type AB               | None |
| X54 | FFPE | Male   | 44 | Thymoma                               | Type B3               | None |

**G. Samples used for TRAP assay, n=16**

| <b>Sample ID</b> | <b>Tissue Type</b>   | <b>Gender</b> | <b>Age</b> | <b>Tumor type</b>       | <b>Grade</b> | <b><i>TERT</i> promoter mutation</b> |
|------------------|----------------------|---------------|------------|-------------------------|--------------|--------------------------------------|
| XG1              | Xenograft            | F             | 41         | Glioblastoma Multiforme | IV           | C228T                                |
| XG2              | Xenograft            | M             | 60         | Glioblastoma Multiforme | IV           | C228T                                |
| XG3              | Xenograft            | F             | 47         | Glioblastoma Multiforme | IV           | C250T                                |
| XG4              | Xenograft            | M             | 50         | Glioblastoma Multiforme | IV           | C250T                                |
| XG5              | Xenograft            | F             | 37         | Glioblastoma Multiforme | IV           | WT                                   |
| XG6              | Xenograft            | F             | 31         | Glioblastoma Multiforme | IV           | WT                                   |
| XG7              | Xenograft            | F             | 44         | Glioblastoma Multiforme | IV           | WT                                   |
| PTT1             | Primary tumor tissue | M             | 53         | Oligodendroglioma       | II           | WT                                   |
| PTT2             | Primary tumor tissue | M             | 48         | Oligoastrocytoma        | II           | WT                                   |
| PTT3             | Primary tumor tissue | M             | 52         | Oligodendroglioma       | II           | C228T                                |
| PTT4             | Primary tumor tissue | M             | 48         | Oligodendroglioma       | II           | C228T                                |
| PTT5             | Primary tumor tissue | M             | 25         | Oligodendroglioma       | II           | C228T                                |
| PTT6             | Primary tumor tissue | F             | 44         | Oligodendroglioma       | II           | C228T                                |
| PTT7             | Primary tumor tissue | M             | 28         | Oligodendroglioma       | II           | C228T                                |
| PTT18            | Primary tumor tissue | M             | 65         | Oligoastrocytoma        | II           | C250T                                |
| PTT44            | Primary tumor tissue | M             | 34         | Oligodendroglioma       | III          | WT                                   |

**H. Samples used for RT-qPCR, along with relative *TERT* mRNA expression**

**(normalized to GAPDH and BSG cell line SF7761, a brain stem glioma cell line**

**transduced with *TERT*), n= 43**

| <b>Sample ID</b> | <b>Tissue Type</b>   | <b>Gender</b> | <b>Age</b> | <b>Tumor Type</b>      | <b>Grade</b> | <b><i>TERT</i> promoter mutation</b> | <b>Relative <i>TERT</i> Expression</b> |
|------------------|----------------------|---------------|------------|------------------------|--------------|--------------------------------------|----------------------------------------|
| PTT15            | Primary tumor tissue | F             | 33         | Astrocytoma            | II           | WT                                   | 0.091                                  |
| PTT27            | Primary tumor tissue | M             | 34         | Astrocytoma            | II           | WT                                   | 0.006                                  |
| PTT40            | Primary tumor tissue | M             | 26         | Astrocytoma            | II           | WT                                   | 0.084                                  |
| PTT43            | Primary tumor tissue | F             | 28         | Astrocytoma            | II           | WT                                   | 0.002                                  |
| PTT26            | Primary tumor tissue | M             | 22         | Diffuse Astrocytoma    | II           | WT                                   | 0.060                                  |
| PTT18            | Primary tumor tissue | M             | 65         | Oligoastrocytoma       | II           | C250T                                | 0.103                                  |
| PTT2             | Primary tumor tissue | M             | 48         | Oligoastrocytoma       | II           | WT                                   | 0.009                                  |
| PTT17            | Primary tumor tissue | M             | 52         | Oligodendroglioma      | II           | WT                                   | 0.071                                  |
| PTT22            | Primary tumor tissue | M             | 64         | Oligodendroglioma      | II           | C228T                                | 0.223                                  |
| PTT33            | Primary tumor tissue | M             | 77         | Oligodendroglioma      | II           | WT                                   | 0.090                                  |
| PTT1             | Primary tumor tissue | M             | 53         | Oligodendroglioma      | II           | WT                                   | 0.019                                  |
| PTT3             | Primary tumor tissue | M             | 52         | Oligodendroglioma      | II           | C228T                                | 0.118                                  |
| PTT4             | Primary tumor tissue | M             | 48         | Oligodendroglioma      | II           | C228T                                | 1.071                                  |
| PTT5             | Primary tumor tissue | M             | 25         | Oligodendroglioma      | II           | C228T                                | 0.035                                  |
| PTT6             | Primary tumor tissue | F             | 44         | Oligodendroglioma      | II           | C228T                                | 0.126                                  |
| PTT7             | Primary tumor tissue | M             | 28         | Oligodendroglioma      | II           | C228T                                | 0.202                                  |
| PTT29            | Primary tumor tissue | M             | 49         | Anaplastic Astrocytoma | III          | WT                                   | 0.048                                  |

|       |                      |   |    |                              |     |       |       |
|-------|----------------------|---|----|------------------------------|-----|-------|-------|
| PTT30 | Primary tumor tissue | F | 55 | Anaplastic Astrocytoma       | III | WT    | 0.003 |
| PTT41 | Primary tumor tissue | F | 42 | Anaplastic Astrocytoma       | III | WT    | 0.003 |
| PTT14 | Primary tumor tissue | F | 21 | Anaplastic Oligoastrocytoma  | III | WT    | 0.002 |
| PTT19 | Primary tumor tissue | M | 45 | Anaplastic Oligoastrocytoma  | III | C228T | 1.408 |
| PTT42 | Primary tumor tissue | M | 32 | Anaplastic Oligoastrocytoma  | III | WT    | 0.023 |
| PTT9  | Primary tumor tissue | F | 25 | Anaplastic Oligodendroglioma | III | WT    | 0.002 |
| PTT24 | Primary tumor tissue | F | 36 | Anaplastic Oligodendroglioma | III | C250T | 0.135 |
| PTT36 | Primary tumor tissue | F | 36 | Anaplastic Oligodendroglioma | III | C250T | 0.437 |
| PTT8  | Primary tumor tissue | M | 61 | Glioblastoma Multiforme      | IV  | C228T | 1.127 |
| PTT10 | Primary tumor tissue | M | 46 | Glioblastoma Multiforme      | IV  | C228T | 0.575 |
| PTT11 | Primary tumor tissue | F | 70 | Glioblastoma Multiforme      | IV  | WT    | 0.061 |
| PTT12 | Primary tumor tissue | M | 58 | Glioblastoma Multiforme      | IV  | WT    | 0.234 |
| PTT13 | Primary tumor tissue | M | 76 | Glioblastoma Multiforme      | IV  | WT    | 0.098 |
| PTT16 | Primary tumor tissue | F | 45 | Glioblastoma Multiforme      | IV  | C228T | 0.354 |
| PTT20 | Primary tumor tissue | M | 45 | Glioblastoma Multiforme      | IV  | C228T | 0.344 |
| PTT21 | Primary tumor tissue | F | 53 | Glioblastoma Multiforme      | IV  | WT    | 0.086 |
| PTT23 | Primary              | M | 56 | Glioblastoma Multiforme      | IV  | C228T | 0.240 |

|       |                      |   |    |                         |    |       |       |
|-------|----------------------|---|----|-------------------------|----|-------|-------|
|       | tumor tissue         |   |    |                         |    |       |       |
| PTT25 | Primary tumor tissue | M | 69 | Glioblastoma Multiforme | IV | WT    | 0.026 |
| PTT28 | Primary tumor tissue | F | 62 | Glioblastoma Multiforme | IV | C228T | 0.315 |
| PTT31 | Primary tumor tissue | F | 22 | Glioblastoma Multiforme | IV | WT    | 0.020 |
| PTT32 | Primary tumor tissue | F | 61 | Glioblastoma Multiforme | IV | C228T | 0.509 |
| PTT34 | Primary tumor tissue | F | 59 | Glioblastoma Multiforme | IV | C228T | 0.346 |
| PTT35 | Primary tumor tissue | M | 46 | Glioblastoma Multiforme | IV | C228T | 0.089 |
| PTT37 | Primary tumor tissue | M | 78 | Glioblastoma Multiforme | IV | C228T | 0.409 |
| PTT38 | Primary tumor tissue | M | 74 | Glioblastoma Multiforme | IV | C250T | 0.169 |
| PTT39 | Primary tumor tissue | M | 83 | Glioblastoma Multiforme | IV | C250T | 0.199 |

## **Recurrent *TERT* promoter mutations identified in a large-scale study of multiple tumor types are associated with increased *TERT* expression and telomerase activation**

Supplementary Materials and Methods

### **Tissue sample collection and preparation**

Tissue samples from Zhejiang Provincial People's Hospital Fresh samples were immediately frozen in -80 °C deep cryogenic freezers after surgical resection. Tissue sections reviewed by two certified pathologists to ensure that  $\geq 50\%$  of the cells used for DNA purification were neoplastic and to confirm the histopathological diagnosis.

The subcutaneous xenografts and the snap frozen primary tumor tissues used for RT-qPCR and telomerase activity assay were obtained from the Preston Robert Tisch Brain Tumor Center BioRepository at Duke University. The methods for subcutaneous xenograft transplantation were performed as previously reported [1]. Tissue was obtained with consent and Institutional Review Board (IRB) approval, in accordance with the Health Insurance Portability and Accountability Act (HIPAA). Tissue sections for sequencing were reviewed by board-certified pathologists to ensure that  $>80\%$  cells used for DNA purification were neoplastic and confirm histopathological diagnosis.

### **PCR amplification for *TERT* promoter sequencing**

Sequences of the *TERT* core promoter region were obtained from the human reference sequence (GRCh37 February 2009; <http://genome.ucsc.edu/>) and amplified by PCR. Primer pairs for PCR amplification and sequencing were generated using Primer3 Plus (<http://primer3plus.com/cgi-bin/dev/primer3plus.cgi>) and to minimize amplification of homologous genomic sequences, were filtered using UCSC in silico PCR (<http://genome.ucsc.edu/cgi-bin/hgPcr?command=start>) to

ensure pairs yielded only a single product. Primer sequences used for the amplification of the *TERT* promoter from FFPE samples were 5'-TGCCCCTTCACCTTCCAGC-3' and 5'-GGCCAGGGCTTCCCACGT-3', generating a 190 bp amplicon (chr5:1,295,120-1,295,309). For frozen tissue samples and xenograft samples, the primer sequences were 5'-M13-GGCCGATTTCGACCTCTCT-3' and 5'-AGCACCTCGCGGTAGTGG-3', amplifying 489 bp of the *TERT* promoter (chr5: 1,295,040-1,295,528), where M13 is a universal sequencing primer with the sequence 5'-TGTAACGACGGCCAGT-3'.

PCR amplification of DNA from FFPE samples was performed in a 25 µl solution, consisting of 1 µl of DNA solution (50–200 ng/µl), 0.1 µl of KAPA2G Fast HotStart DNA polymerase (5 U/µl), 5 µl of 5X KAPA2G Buffer A, 0.5 µl of dNTP mix(10 mM each), 10% (v/v) DMSO, and 1.25 µl of each primer (10 µM). PCR was conducted using a PTC-200 thermal cycler (BIO-RAD, CA, USA) with an initial denaturation step at 95 °C for 2 min, followed by 45 cycles of denaturation at 95 °C for 15 s, annealing at 62 °C for 15 s, extension at 72 °C for 1 s, and a final extension at 72°C for 10 min.

The PCR amplification of DNA from frozen tissue samples was performed in a 50 µl solution, consisting of 1 µl of DNA solution (50–200 ng/µl), 0.5 µl of PrimeSTAR HS DNA Polymerase (2.5 U/µl), and 25 µl of 2X 2×PrimeSTAR GC Buffer, 4 µl of dNTP mixture (2.5 mM each), and 1 µl of each primer (10 µM). This amplification was performed using a PTC-200 thermal cycler with an initial denaturing step at 95 °C for 2 min, followed by 3 cycles of denaturation at 95 °C for 20 s, annealing at 64 °C for 15 s, extension at 72 °C for 5 s, and 3 cycles of denaturation at 95 °C for 20 s, annealing at 61 °C for 15 s, extension at 72 °C for 5 s, and 3 cycles of denaturation at 95 °C for 20 s, annealing at 58 °C for 15 s, and 35 cycles of denaturation at 95 °C for 20 s, annealing at 57 °C for 15 s, extension at 72 °C for 5 s, and a final extension at 72°C for 10 min.

The PCR amplification of DNA from xenograft tissue samples and primary tumor tissues was performed in a 15  $\mu$ l solution, consisting of 1.5  $\mu$ l of DNA solution (10–50 ng/ $\mu$ l), 0.06  $\mu$ l of KAPA2G Fast HotStart DNA Polymerase (2.5 U/ $\mu$ l), and 3  $\mu$ l of 5X KAPA2G Buffer A, 0.3  $\mu$ l of dNTP mixture (10 mM), 0.9  $\mu$ l DMSO, and 0.15  $\mu$ l of each primer (100  $\mu$ M). Of the seven xenografts used in this study, 4 cases had been analyzed in previous studies of the *TERT* promoter [2]. Amplification was performed using a Bio Rad C1000 Touch thermal cycler with an initial denaturing step at 95 °C for 2 min, followed by 3 cycles of denaturation at 95 °C for 20 s, annealing at 64 °C for 15 s, extension at 72 °C for 5 s, and 3 cycles of denaturation at 95 °C for 20 s, annealing at 61 °C for 15 s, extension at 72 °C for 5 s, and 3 cycles of denaturation at 95 °C for 20 s, annealing at 58 °C for 15 s, and 35 cycles of denaturation at 95 °C for 20 s, annealing at 57 °C for 15 s, extension at 72 °C for 5 s, and a final extension at 72°C for 5 min.

### **TRAP assay**

For the TRAP assay, about 20 mg of tissue sections from snap-frozen xenografts or primary tumors were homogenized in 200  $\mu$ l ice-cold CHAPS lysis buffer supplemented with 150 units RNAase inhibitor by TissueLyser LT. After incubation on ice for 30 min, the lysates were centrifuged at 15,000 g for 20 min at 4 °C and the supernatants were quickly frozen and stored at -80 °C. The protein concentration of the extract was determined by the BCA method. In each TRAP experiment, 2  $\mu$ l of extract containing 1  $\mu$ g of protein was used. A reaction mixture with 2  $\mu$ l of CHAPS lysis buffer or HeLa cell lysate (instead of tissue extract) were used as negative and positive controls, respectively. As an internal negative control, several tissue extracts were randomly selected and heat-inactivated at 85 °C for 10 min. The PCR reaction mixture was incubated at 30 °C for 30 min for telomerase-mediated extension of TS primer, followed by 94 °C for 3 min to inactivate the telomerase and activate the Taq polymerase. This mixture was then



subjected to 33 PCR cycles at 94 °C for 30 s, 59 °C for 30 s, and 72 °C for 60 s.

### **RT-qPCR for measurement of *TERT* mRNA expression**

Real time quantitative PCR was done using SensiFAST SYBR® No-ROX Kit (Bioline, USA) in triplicate using the following primers for *TERT* mRNA expression:

- Forward: 5'-CCGATTGTGAACATGGACTACG-3'
- Reverse: 5'-CACGCTGAACAGTGCCTTC-3'

GAPDH was used as an internal standard to which all *TERT* mRNA expression levels were normalized:

- Forward: 5'-AGCCACATCGCTCAGACAC-3'
- Reverse: 5'-GAGGCATTGCTGATGATCTTG-3'

One brain stem glioma cell line, SF7761, which has been transduced with *TERT* and therefore overexpresses *TERT*, was used as a reference [3].

### **DNA constructs and site-directed mutagenesis**

The promoter fragment of *TERT* (-424 to +65) was amplified from normal blood genomic DNA using the primers:

- Forward: 5'-CGGGGTACCGGCCGATTCGACCTCTCT-3'
- Reverse: 5'-CCGCTCGAGAGCACCTCGCGGTAGTGG-3'

Mutagenesis primers used with the QuikChange II XL Site-Directed Mutagenesis Kit (Stratagene, USA) were:

- C228T:

- Forward: 5'-GAGGGCCCCGGAAGGGGCTGGGCC-3'
- Reverse: 5'-GGCCCAGCCCCTTCCGGGCCCTC-3'
- C250T:
  - Forward: 5'-CCGTCCCGACCCCTTCCGGGTCC-3'
  - Reverse: 5'-GGACCCGGAAGGGGTCTGGGACGG-3'
- A161C:
  - Forward: 5'-CAGCGCTGCCGAAACTCGCGCCG-3'
  - Reverse: 5'-CGGCGCGAGTTTCCGGCAGCGCTG-3'
- C242T+C243T:
  - Forward: 5'-CTGGGCCGGAACCCGGGAGGGGTCTGGG-3'
  - Reverse: 5'-CCCGACCCCTCCCGGGTTTCCGGCCCAG-3'

PCR program used for site-directed mutagenesis was:

Mutagenesis PCR was performed using a Bio Rad C1000 Touch thermal cycler with an initial denaturing step at 95 °C for 1 min, followed by 17 cycles of denaturation at 95 °C for 50 s, annealing at 60 °C for 50 s, extension at 68 °C for 5 min and 30 s, and a final extension at 68 °C for 7 min.

## References

- [1] Bota DA, Alexandru D, Keir ST, Bigner D, Vredenburgh J, Friedman HS. Proteasome inhibition with bortezomib induces cell death in GBM stem-like cells and temozolomide-resistant glioma cell lines, but stimulates GBM stem-like cells' VEGF production and angiogenesis. *J Neurosurg* 2013;119(6):1415-23.
- [2] Killela PJ, Reitman ZJ, Jiao Y, Bettegowda C, Agrawal N, Diaz LA, Jr., et al. TERT promoter mutations occur frequently in gliomas and a subset of tumors derived from cells with low rates of self-renewal. *Proc Natl Acad Sci U S A* 2013;110(15):6021-6.
- [3] Hashizume R, Smirnov I, Liu S, Phillips JJ, Hyer J, McKnight TR, et al. Characterization of a diffuse intrinsic pontine glioma cell line: implications for future investigations and treatment. *J Neurooncol* 2012;110(3):305-13.
